# Supplementary material for: A simple and efficient one-pot synthesis of 2-alkyl/aryl/pyridyl substituted 2H-chromenes
Source: Royal Society of Chemistry journal article supplement (doi:10.1039/c5nj01377a), 2015-01-01

## Electronic supporting information

### A Simple and Efficient One-Pot Synthesis of 2-Alkyl/aryl/pyridyl Substituted 2H-Chromenes

Lenka Chandrasekhara Rao<sup>a</sup>, Nandigama Satish Kumar<sup>a</sup>, Nanubolu Jagadeesh Babu<sup>b</sup> and Harshadas Mitaram Meshram<sup>a,\*</sup>

<sup>a</sup>Medicinal chemistry and pharmacology division, <sup>b</sup>Laboratory of X-ray Crystallography,  
CSIR-Indian Institute of Chemical Technology, Hyderabad – 500 007, India

Tel.: +91-40-27191640, Fax: 91-40-27160512

E-mail: [hmmeshram@yahoo.com](mailto:hmmeshram@yahoo.com)

#### Contents

|                                                               |         |
|---------------------------------------------------------------|---------|
| X-Ray crystallographic data of compound ( <b>3f</b> ) -----   | S2-3    |
| General procedure -----                                       | S3      |
| Spectral data of all compounds -----                          | S4-S10  |
| <sup>1</sup> H NMR and <sup>13</sup> C of all compounds ----- | S11-S39 |

### 3f Crystallographic Data

**Crystallographic data for 3f:** C<sub>17</sub>H<sub>13</sub>Cl<sub>2</sub>NO<sub>4</sub>, *M* = 366.18, colourless block, 0.43 x 0.27 x 0.14 mm<sup>3</sup>, triclinic, space group *P* $\bar{1}$  (No. 2), *a* = 7.7181(13), *b* = 8.3117(14), *c* = 14.132(2) Å,  $\alpha$  = 99.319(3),  $\beta$  = 103.875(2),  $\gamma$  = 106.460(3)°, *V* = 817.9(2) Å<sup>3</sup>, *Z* = 2, *D*<sub>c</sub> = 1.487 g/cm<sup>3</sup>, *F*<sub>000</sub> = 376, CCD area detector, MoK $\alpha$  radiation,  $\lambda$  = 0.71073 Å, *T* = 293(2)K,  $2\theta_{\max}$  = 50.0°, 7594 reflections collected, 2869 unique (*R*<sub>int</sub> = 0.0273), Final *Goof* = 1.121, *R*1 = 0.0554, *wR*2 = 0.1352, *R* indices based on 2434 reflections with *I* > 2 $\sigma$ (*I*) (refinement on *F*<sup>2</sup>), 222 parameters,  $\mu$  = 0.418 mm<sup>-1</sup>. Crystallographic data for the structure in this paper has been deposited with the Cambridge Crystallographic Data Centre and obtained a unique depository number, CCDC 1048680. The data can be obtained free of charge from <https://summary.ccdc.cam.ac.uk/structure-summary-form> or by writing to the Cambridge Crystallographic Data Centre (CCDC), 12 Union Road, Cambridge CB2 1EZ, UK; fax: +44(0) 1223 336 033; email: [deposit@ccdc.cam.ac.uk](mailto:deposit@ccdc.cam.ac.uk)

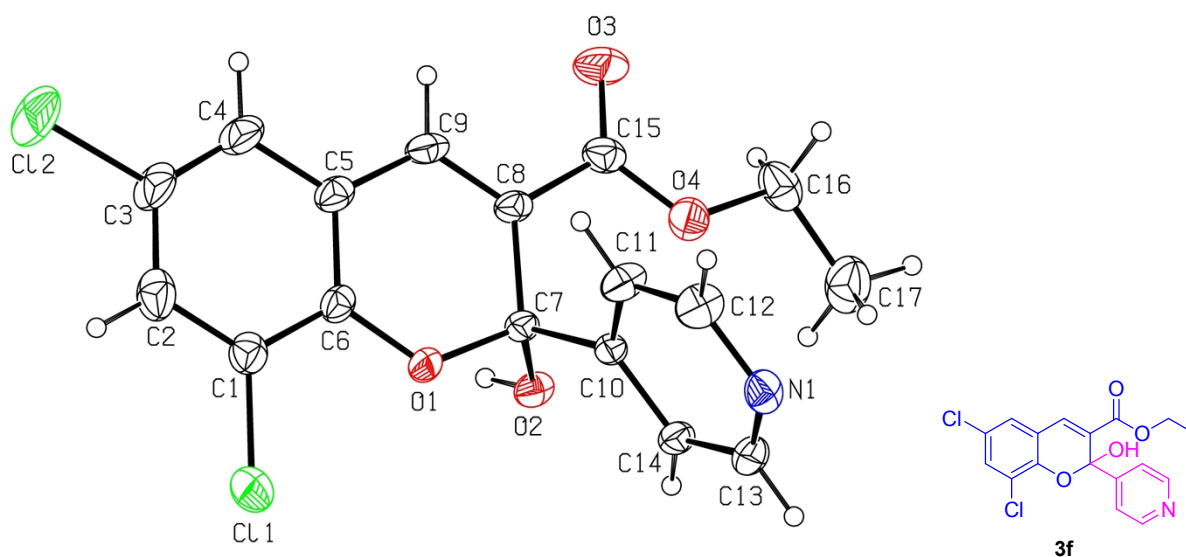

**Figure caption:** The ORTEP diagram of 3f with the atom-numbering scheme. Displacement ellipsoids are drawn at the 30% probability level and H atoms are shown as small spheres of arbitrary radius.

**Data collection:** X-ray data for the compound were collected at room temperature using a Bruker Smart Apex CCD diffractometer with graphite monochromated MoK $\alpha$  radiation ( $\lambda=0.71073\text{\AA}$ ) with  $\omega$ -scan method.<sup>1</sup> Preliminary lattice parameters and orientation matrices were obtained from four sets of frames. Unit cell dimensions were determined using 3682 reflections for 3f data. Integration and scaling of intensity data were accomplished using SAINT program.<sup>1</sup> The structure was solved by Direct Methods using SHELXS97<sup>2</sup> and refinement was carried out by full-matrix least-squares technique using SHELXL97.<sup>2</sup> Anisotropic displacement parameters were included for all non-hydrogen atoms. O-bound H atom was located from the difference Fourier map. All other H atoms were positioned geometrically and treated as riding on their parent C atoms with C-H distances of 0.93--0.97  $\text{\AA}$ , and with  $U_{\text{iso}}(\text{H}) = 1.2U_{\text{eq}}(\text{C})$  or  $1.5U_{\text{eq}}$  for methyl atoms.

1. SMART & SAINT. Software Reference manuals. Versions 6.28a & 5.625, Bruker Analytical X-ray Systems Inc., Madison, Wisconsin, U.S.A., 2001.
2. Sheldrick, G. M. SHELXS97 and SHELXL97, Programs for crystal structure solution and refinement; University of Gottingen: Germany, 1997.

### Experimental Part

**General:** Salicylaldehydes,  $\beta$ -keto esters, L-proline, TBAB and all solvents were purchased from Sigma Aldrich and Alpha Aesar company and used without further purification as received. All  $^1\text{H}$  and  $^{13}\text{C}$  NMR spectra were recorded in  $\text{CDCl}_3$  or  $\text{CDCl}_3+\text{DMSO}$  on Avance 300 or Avance 500 spectrometers. Chemical shifts ( $\delta$ ) are reported in parts per million (ppm) relative to residual  $\text{CHCl}_3$  ( $^1\text{H}$ :  $\delta$  7.26 ppm,  $^{13}\text{C}$ :  $\delta$  77.00 ppm) as an internal reference. Coupling constants (J) are reported in Hertz (Hz). Peak multiplicity is indicated as follows: s—singlet, d—doublet, t—triplet, q—quartet, m—multiplet and dd—doublet of doublet. Melting points were measured on a BUCHI melting point machine. IR spectra were recorded on Thermo Nicolet FT/IR-5700 spectrometer. Mass spectra were recorded using Waters mass spectrometer. High resolution mass spectrums (HRMS) were recorded using Applied Bio-Sciences HRMS spectrometer at national center for mass spectroscopy-IICT.

**General procedure:** In a typical experiment the salicylaldehyde (1mmol),  $\beta$ -keto ester or  $\beta$ -diketone (1mmol), L-proline (30 mol%) catalytic amount of TBAB (5 mol%) in  $\text{H}_2\text{O}$  (2 ml) were placed in a 10ml round-bottomed flask and stirred at room temperature for 6 h. After completion of the reaction (monitored by TLC), extracted with ethylacetate and dried over  $\text{Na}_2\text{SO}_4$  and the solvent was removed under reduced pressure and the crude product was purified by column chromatography using ethyl acetate/hexane. All compounds were characterized by (NMR, Mass, and IR) spectral data. Further, we have done the reaction up to 5g scales.

**Ethyl 2-hydroxy-2-(pyridin-4-yl)-2H-chromene-3-carboxylate (table 2, 3a):**

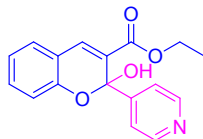

White solid; Mp 145-147 °C; IR:  $\nu_{\max}$  3061, 2919, 2808, 2649, 1717, 1632, 1602, 1451, 1360, 1209, 1157, 1068, 926, 762  $\text{cm}^{-1}$ ;  $^1\text{H}$  NMR (300 MHz,  $\text{CDCl}_3$ +DMSO):  $\delta$  8.55 (d,  $J = 5.47$  Hz, 2H), 7.94 (br-s, 1H), 7.80 (s, 1H), 7.56 (d,  $J = 5.47$  Hz, 2H), 7.35 (t,  $J = 7.36$  Hz, 2H), 7.04 (t,  $J = 7.36$  Hz, 1H), 6.94 (d,  $J = 8.49$  Hz, 1H), 3.91-4.13 (m, 2H), 1.05 (t,  $J = 7.18$  Hz, 3H);  $^{13}\text{C}$  NMR (75 MHz,  $\text{CDCl}_3$ +DMSO):  $\delta$  163.7, 151.9, 151.7, 148.5, 134.4, 132.0, 128.4, 124.9, 121.4, 121.1, 118.0, 116.2, 97.0, 60.2, 13.4; m/z (ESI); 298  $[\text{M}+\text{H}]^+$ , 320  $[\text{M}+23]^+$ . HRMS calcd for  $\text{C}_{17}\text{H}_{16}\text{NO}_4$ : 298.10639, found: 298.10622.

**Ethyl 6-chloro-2-hydroxy-2-(pyridin-4-yl)-2H-chromene-3-carboxylate (table 2, 3b):**

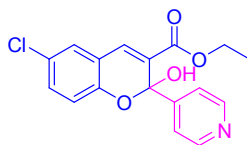

White solid; Mp 165-167 °C; IR:  $\nu_{\max}$  3068, 2975, 2736, 1703, 1621, 1600, 1438, 1265, 1209, 1145, 1054, 912, 739  $\text{cm}^{-1}$ ;  $^1\text{H}$  NMR (300 MHz,  $\text{CDCl}_3$ +DMSO):  $\delta$  8.56 (d,  $J = 5.29$  Hz, 2H), 8.11 (br-s, 1H), 7.74 (s, 1H), 7.54 (d,  $J = 5.29$  Hz, 2H), 7.36 (s, 1H), 7.30 (dd,  $J_1 = 8.69$  Hz,  $J_2 = 1.51$  Hz, 1H), 6.90 (d,  $J = 8.49$  Hz, 1H), 3.92-4.11 (m, 2H), 1.06 (t,  $J = 8.49$  Hz, 3H);  $^{13}\text{C}$  NMR (75 MHz,  $\text{CDCl}_3$ +DMSO):  $\delta$  162.4, 150.5, 149.5, 147.8, 132.2, 130.6, 126.7, 125.4, 125.0, 120.2, 118.7, 116.9, 96.5, 59.5, 12.6; m/z (ESI); 332  $[\text{M}+\text{H}]^+$ . HRMS calcd for  $\text{C}_{17}\text{H}_{15}\text{ClNO}_4$ : 332.06750, found: 332.06841.

**Ethyl 6-bromo-2-hydroxy-2-(pyridin-4-yl)-2H-chromene-3-carboxylate (table 2, 3c):**

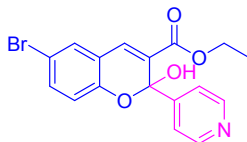

White solid; Mp 172-174 °C; IR:  $\nu_{\max}$  3071, 2986, 2748, 1704, 1628, 1605, 1447, 1284, 1217, 1134, 1062, 906, 731  $\text{cm}^{-1}$ ;  $^1\text{H}$  NMR (300 MHz,  $\text{CDCl}_3$ +DMSO):  $\delta$  8.60 (m, 2H), 7.99 (s, 1H), 7.74 (s, 1H), 7.40-7.60 (m, 4H), 6.83-6.91 (m, 1H), 3.92-4.14 (m, 2H), 1.06 (t,  $J = 7.74$  Hz, 3H);  $^{13}\text{C}$  NMR (75 MHz,  $\text{CDCl}_3$ +DMSO):  $\delta$  163.1, 151.1, 150.6, 148.4, 134.0, 132.7, 130.2, 125.9, 120.8, 119.7, 117.9, 112.8, 97.0, 60.1, 13.1; m/z (ESI); 376  $[\text{M}+\text{H}]^+$ . HRMS calcd for  $\text{C}_{17}\text{H}_{15}\text{BrNO}_4$ : 376.01771, found: 376.01790.

**Ethyl 2-hydroxy-6-nitro-2-(pyridin-4-yl)-2H-chromene-3-carboxylate (table 2, 3d):**

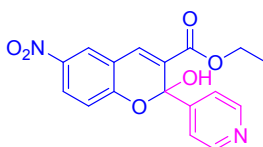

White solid; Mp 191-193 °C; IR:  $\nu_{\max}$  3063, 2978, 2732, 1706, 1625, 1602, 1439, 1277, 1219, 1144, 1051, 917, 726  $\text{cm}^{-1}$ ;  $^1\text{H}$  NMR (300 MHz,  $\text{CDCl}_3$ +DMSO):  $\delta$  8.61 (d,  $J = 5.48$  Hz, 2H), 8.37 (d,  $J = 2.26$  Hz, 1H), 8.22 (dd,  $J_1 = 6.42$  Hz,  $J_2 = 2.45$  Hz, 1H), 7.93 (s, 1H), 7.53 (d,  $J = 5.85$  Hz, 2H), 7.06 (d,  $J = 9.06$  Hz, 1H), 3.98-4.12 (m, 2H), 1.09 (t,  $J = 6.99$  Hz, 3H);  $^{13}\text{C}$  NMR (75 MHz,  $\text{CDCl}_3$ +DMSO):  $\delta$  161.9, 148.0, 140.5, 131.9, 126.2, 123.4, 120.1, 117.2, 115.9, 59.7, 12.6;  $m/z$  (ESI); 343  $[\text{M}+\text{H}]^+$ . HRMS calcd for  $\text{C}_{17}\text{H}_{15}\text{N}_2\text{O}_6$ : 343.09164, found: 343.09246.

### Ethyl 2,7-dihydroxy-2-(pyridin-4-yl)-2H-chromene-3-carboxylate (table 2, 3e):

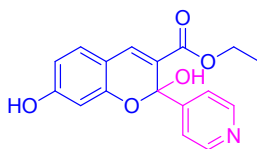

White solid; Mp 250-252 °C; IR:  $\nu_{\max}$  3305, 3086, 2966, 2718, 1708, 1608, 1601, 1415, 1266, 1208, 1145, 1058, 926, 746  $\text{cm}^{-1}$ ;  $^1\text{H}$  NMR (300 MHz,  $\text{CDCl}_3$ +DMSO):  $\delta$  9.90 (br-s, 1H), 8.53 (d,  $J = 4.72$  Hz, 2H), 7.88 (s, 1H), 7.74 (s, 1H), 7.50 (d,  $J = 4.72$  Hz, 2H), 7.21 (d,  $J = 8.31$  Hz, 1H), 6.34 (s, 1H), 3.84-4.06 (m, 2H), 3.44 (s, 3H), 1.03 (t,  $J = 6.99$  Hz, 3H);  $^{13}\text{C}$  NMR (75 MHz,  $\text{CDCl}_3$ +DMSO):  $\delta$  162.6, 160.7, 152.4, 151.1, 147.4, 133.7, 128.7, 119.9, 119.6, 109.1, 108.6, 101.6, 96.5, 58.5, 12.4;  $m/z$  (ESI); 314  $[\text{M}+\text{H}]^+$ . HRMS calcd for  $\text{C}_{17}\text{H}_{16}\text{NO}_5$ : 314.10187, found: 314.10230.

### Ethyl 6,8-dichloro-2-hydroxy-2-(pyridin-4-yl)-2H-chromene-3-carboxylate (table 2, 3f):

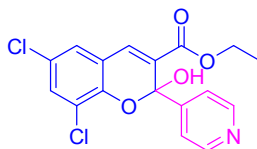

White solid; Mp 173-175 °C; IR:  $\nu_{\max}$  3324, 3023, 2938, 2842, 1703, 1639, 1519, 1446, 1281, 1228, 1035, 824, 737  $\text{cm}^{-1}$ ;  $^1\text{H}$  NMR (300 MHz,  $\text{CDCl}_3$ +DMSO):  $\delta$  8.59 (d,  $J = 5.95$  Hz, 2H), 8.36 (br-s, 1H), 7.72 (s, 1H), 7.56 (d,  $J = 6.10$  Hz, 2H), 7.41 (d,  $J = 2.44$  Hz, 1H), 7.31 (d,  $J = 2.29$  Hz, 1H), 3.94-4.11 (m, 2H), 1.07 (t,  $J = 7.17$  Hz, 3H);  $^{13}\text{C}$  NMR (75 MHz,  $\text{CDCl}_3$ +DMSO):  $\delta$  162.6, 150.3, 148.3, 146.1, 132.1, 130.8, 132.1, 130.8, 126.7, 125.8, 125.3, 120.8, 120.6, 60.2, 13.0;  $m/z$  (ESI); 366  $[\text{M}+\text{H}]^+$ . HRMS calcd for  $\text{C}_{22}\text{H}_{14}\text{O}_4\text{NCl}_2$ : 366.02892, found: 366.02944.

### Ethyl 6,8-dibromo-2-hydroxy-2-(pyridin-4-yl)-2H-chromene-3-carboxylate (table 2, 3g):

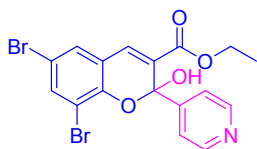

White solid; Mp 248-250 °C; IR:  $\nu_{\max}$  3324, 3019, 2962, 2831, 1702, 1616, 1524, 1416, 1229, 1208, 1024, 819, 733  $\text{cm}^{-1}$ ;  $^1\text{H}$  NMR (300 MHz,  $\text{CDCl}_3$ +DMSO):  $\delta$  8.32-8.68 (m, 3H), 7.66-7.79 (m, 2H), 7.48-7.61 (m, 3H), 3.90-4.12 (m, 2H), 1.07 (t,  $J = 7.17$  Hz, 3H);  $^{13}\text{C}$  NMR (75 MHz,  $\text{CDCl}_3$ +DMSO):  $\delta$  162.6, 150.3, 148.2, 147.6, 136.2, 132.0, 129.7, 126.6, 120.9, 120.5, 112.6, 110.6, 60.2, 13.0;  $m/z$  (ESI); 456  $[\text{M}+\text{H}]^+$ . HRMS calcd for  $\text{C}_{22}\text{H}_{14}\text{NO}_4\text{Br}_2$ : 456.92458, found: 456.92025.

### Ethyl 2-hydroxy-6,8-diiodo-2-(pyridin-4-yl)-2H-chromene-3-carboxylate (table 2, 3h):

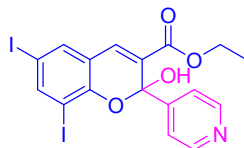

White solid; Mp 163-165 °C; IR:  $\nu_{\max}$  3418, 3058, 2926, 2853, 1699, 1625, 1537, 1434, 1278, 1218, 1011, 812, 728  $\text{cm}^{-1}$ ;  $^1\text{H}$  NMR (300 MHz,  $\text{CDCl}_3$ +DMSO):  $\delta$  8.52-8.64 (m, 2H), 8.37-8.46 (m, 1H), 8.05 (d,  $J = 2.08$  Hz, 1H), 7.85 (d,  $J = 1.89$  Hz, 1H), 7.74 (s, 1H), 7.50 (d,  $J = 4.34$  Hz, 2H), 3.89-4.08 (m, 2H), 1.02 (t,  $J = 6.99$  Hz, 3H);  $^{13}\text{C}$  NMR (75 MHz,  $\text{CDCl}_3$ +DMSO):  $\delta$  161.3, 149.7, 149.3, 147.3, 145.9, 135.3, 131.2, 125.0, 119.7, 119.4, 97.1, 84.9, 82.7, 58.8, 12.0; m/z (ESI); 550  $[\text{M}+\text{H}]^+$ . HRMS calcd for  $\text{C}_{22}\text{H}_{14}\text{NO}_4\text{I}_2$ : 549.89859, found: 549.90067.

### Ethyl 7-(allyloxy)-2-hydroxy-2-(pyridin-4-yl)-2H-chromene-3-carboxylate (table 2, 3i):

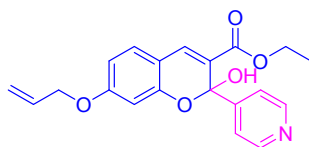

Semi solid; IR:  $\nu_{\max}$  2984, 1708, 1611, 1560, 1502, 1368, 1284, 1208, 1120, 1002, 756  $\text{cm}^{-1}$ ;  $^1\text{H}$  NMR (300 MHz,  $\text{CDCl}_3$ ):  $\delta$  8.49 (d,  $J = 5.95$  Hz, 2H), 7.74 (s, 1H), 7.52 (d,  $J = 6.26$  Hz, 2H), 7.19 (d,  $J = 8.39$  Hz, 1H), 6.61 (dd,  $J_1 = 8.39$  Hz,  $J_2 = 2.44$  Hz, 1H), 6.49 (d,  $J = 2.14$  Hz, 1H), 5.96-6.05 (m, 1H), 5.37-5.42 (m, 1H), 5.27-5.31 (m, 1H), 4.51 (td,  $J_1 = 3.82$  Hz,  $J_2 = 1.53$  Hz, 2H), 4.07-4.14 (m, 2H), 1.11 (t,  $J = 7.17$  Hz, 3H);  $^{13}\text{C}$  NMR (75 MHz,  $\text{CDCl}_3$ ):  $\delta$  164.9, 162.8, 153.5, 151.6, 149.2, 135.3, 132.3, 129.9, 121.9, 120.9, 118.2, 111.4, 110.2, 102.2, 97.8, 69.0, 60.9, 13.9; m/z (ESI); 354  $[\text{M}+\text{H}]^+$ .

### Ethyl 7-(benzyloxy)-2-hydroxy-2-(pyridin-4-yl)-2H-chromene-3-carboxylate (table 2, 3j):

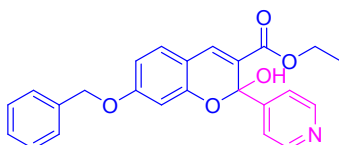

White solid; Mp 163-165 °C; IR:  $\nu_{\max}$  3419, 3058, 2984, 2830, 1712, 1611, 1568, 1460, 1293, 1218, 1075, 1018, 818, 702  $\text{cm}^{-1}$ ;  $^1\text{H}$  NMR (300 MHz,  $\text{CDCl}_3$ +DMSO):  $\delta$  8.56 (d,  $J = 5.85$  Hz, 2H), 7.78 (s, 1H), 7.55 (d,  $J = 5.85$  Hz, 2H), 7.24-7.42 (m, 6H), 6.68 (dd,  $J_1 = 6.42$  Hz,  $J_2 = 2.08$  Hz, 1H), 6.55 (d,  $J = 2.08$  Hz, 1H), 5.06 (s, 2H), 3.90-4.11 (m, 2H), 1.05 (t,  $J = 7.17$  Hz, 3H);  $^{13}\text{C}$  NMR (75 MHz,  $\text{CDCl}_3$ +DMSO):  $\delta$  163.4, 161.6, 152.9, 151.5, 148.1, 135.5, 133.9, 129.1, 127.7, 127.2, 126.6, 121.4, 120.6, 111.2, 108.8, 101.4, 96.9, 69.2, 59.5, 13.0; m/z (ESI); 404  $[\text{M}+\text{H}]^+$ .

### Ethyl 2-hydroxy-7-(2-methoxy-2-oxoethoxy)-2-(pyridin-4-yl)-2H-chromene-3-carboxylate (table 2, 3k):

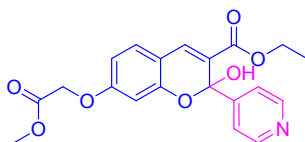

White solid; Mp 153-155 °C; IR:  $\nu_{\max}$  3073, 2790, 2645, 1758, 1705, 1611, 1566, 1454, 1293, 1220, 1065, 999, 855, 718  $\text{cm}^{-1}$ ;  $^1\text{H}$  NMR (300 MHz,  $\text{CDCl}_3$ ):  $\delta$  8.48-8.53 (m, 2H), 7.74 (s, 1H), 7.51 (dd,  $J_1 = 4.58$  Hz,  $J_2 = 1.68$  Hz, 2H), 7.22 (d,  $J = 8.54$  Hz, 1H), 6.60-6.64 (m, 1H), 6.44 (d,  $J = 2.29$  Hz, 1H), 4.62 (s, 2H), 4.00-4.14 (m, 2H), 3.79

(s, 3H), 1.14 (t,  $J = 7.17$  Hz, 3H);  $^{13}\text{C}$  NMR (75 MHz,  $\text{CDCl}_3$ ):  $\delta$  168.6, 164.6, 161.5, 153.4, 152.1, 148.1, 134.8, 130.0, 122.1, 121.2, 112.3, 109.7, 102.1, 97.8, 64.9, 60.8, 52.3, 13.8;  $m/z$  (ESI); 386  $[\text{M}+\text{H}]^+$ .

**Ethyl 7-(2-ethoxy-2-oxoethoxy)-2-hydroxy-2-(pyridin-4-yl)-2H-chromene-3-carboxylate (table 2, 3l):**

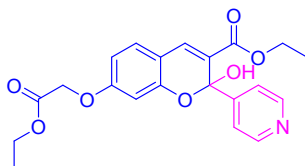

White solid; Mp 157-159 °C; IR:  $\nu_{\text{max}}$  3068, 2792, 2656, 1751, 1704, 1609, 1558, 1446, 1287, 1224, 1068, 976, 856, 727  $\text{cm}^{-1}$ ;  $^1\text{H}$  NMR (300 MHz,  $\text{CDCl}_3$ ):  $\delta$  8.41-8.49 (m, 2H), 7.72 (s, 1H), 7.52 (dd,  $J_1 = 4.73$  Hz,  $J_2 = 1.37$  Hz, 2H), 7.17-7.21 (m, 1H), 6.61 (d,  $J = 8.39$  Hz, 1H), 6.43-6.45 (m, 1H), 4.59 (s, 2H), 4.24 (q,  $J = 7.17$  Hz, 2H), 3.99-4.13 (m, 2H), 1.28 (t,  $J = 7.17$  Hz, 3H), 1.14 (t,  $J = 7.01$  Hz, 3H);  $^{13}\text{C}$  NMR (75 MHz,  $\text{CDCl}_3$ ):  $\delta$  168.1, 164.5, 161.6, 153.4, 152.1, 148.5, 149.8, 134.8, 129.9, 122.1, 121.2, 112.3, 109.7, 102.1, 97.8, 65.1, 61.5, 60.8, 14.0, 13.8;  $m/z$  (ESI); 400  $[\text{M}+\text{H}]^+$ .

**Ethyl 6-bromo-2-hydroxy-2-(4-nitrophenyl)-2H-chromene-3-carboxylate (table 2, 3m):**

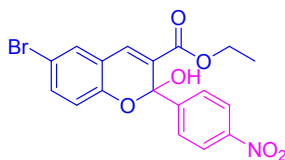

White solid; Mp 127-129 °C; IR:  $\nu_{\text{max}}$  3054, 2789, 2648, 1707, 1605, 1444, 1275, 1213, 1062, 873, 729  $\text{cm}^{-1}$ ;  $^1\text{H}$  NMR (300 MHz,  $\text{CDCl}_3+\text{DMSO}$ ):  $\delta$  8.20 (d,  $J = 8.88$  Hz, 2H), 8.02 (s, 1H), 7.83 (d,  $J = 8.69$  Hz, 2H), 7.75 (s, 1H), 7.52 (d,  $J = 2.08$  Hz, 1H), 7.44 (dd,  $J_1 = 6.42$  Hz,  $J_2 = 2.27$  Hz, 1H), 6.85 (d,  $J = 8.49$  Hz, 1H), 3.92-4.13 (m, 2H), 1.09 (t,  $J = 7.18$  Hz, 3H);  $^{13}\text{C}$  NMR (75 MHz,  $\text{CDCl}_3+\text{DMSO}$ ):  $\delta$  162.9, 150.4, 149.4, 146.7, 133.9, 132.5, 130.1, 126.9, 125.8, 121.9, 119.6, 117.8, 112.7, 97.1, 60.0, 13.1;  $m/z$  (ESI); 420  $[\text{M}+\text{H}]^+$ .

**Ethyl 6-chloro-2-hydroxy-2-(4-nitrophenyl)-2H-chromene-3-carboxylate (table 2, 3n):**

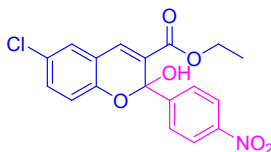

White solid; Mp 121-123 °C; IR:  $\nu_{\text{max}}$  3072, 2803, 2654, 1709, 1606, 1448, 1275, 1229, 1062, 970, 848, 734  $\text{cm}^{-1}$ ;  $^1\text{H}$  NMR (300 MHz,  $\text{CDCl}_3+\text{DMSO}$ ):  $\delta$  8.20 (d,  $J = 8.88$  Hz, 2H), 8.02 (s, 1H), 7.83 (d,  $J = 8.69$  Hz, 2H), 7.75 (s, 1H), 7.38 (d,  $J = 2.45$  Hz, 1H), 7.31 (dd,  $J_1 = 6.23$  Hz,  $J_2 = 2.45$  Hz, 1H), 6.91 (d,  $J = 8.69$  Hz, 1H), 3.89-4.13 (m, 2H), 1.09 (t,  $J = 7.18$  Hz, 3H);  $^{13}\text{C}$  NMR (75 MHz,  $\text{CDCl}_3+\text{DMSO}$ ):  $\delta$  162.8, 149.9, 149.3, 146.6, 132.6, 131.0, 127.1, 126.9, 125.5, 121.8, 118.9, 117.3, 97.1, 59.9, 13.1;  $m/z$  (ESI); 376  $[\text{M}+\text{H}]^+$ .

**Methyl 6-bromo-2-hydroxy-2-methyl-2H-chromene-3-carboxylate (table 3, 3aa):**

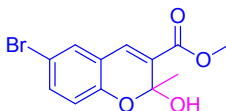

White solid; Mp 106-108 °C; IR:  $\nu_{\max}$  3338, 3058, 2975, 1696, 1617, 1524, 1339, 1243, 1051, 945, 760  $\text{cm}^{-1}$ ;  $^1\text{H}$  NMR (300 MHz,  $\text{CDCl}_3$ ):  $\delta$  7.50 (s, 1H), 7.40 (dd,  $J_1 = 8.69$  Hz,  $J_2 = 2.27$  Hz, 1H), 7.36 (d,  $J = 2.27$  Hz, 1H), 6.86 (d,  $J = 8.69$  Hz, 1H), 3.85 (s, 3H), 3.74 (br-s, 1H), 1.96 (s, 3H); m/z (ESI): 321  $[\text{M}+\text{Na}]^+$ , 281  $[\text{M}-\text{OH}]^+$ .

**Ethyl 6-bromo-2-hydroxy-2-methyl-2H-chromene-3-carboxylate (table 3, 3ab):**

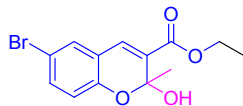

White solid; Mp 128-130 °C; IR:  $\nu_{\max}$  3345, 3065, 2987, 1698, 1609, 1524, 1338, 1256, 1067, 941, 762  $\text{cm}^{-1}$ ;  $^1\text{H}$  NMR (300 MHz,  $\text{CDCl}_3$ ):  $\delta$  7.48 (s, 1H), 7.36-7.42 (m, 2H), 6.86 (d,  $J = 8.49$  Hz, 1H), 4.23-4.36 (m, 2H), 3.81 (br-s, 1H), 1.95 (s, 3H), 1.37 (t,  $J = 7.17$  Hz, 3H);  $^{13}\text{C}$  NMR (75 MHz,  $\text{CDCl}_3$ ):  $\delta$  164.8, 151.5, 134.7, 132.7, 130.7, 126.7, 120.5, 118.6, 113.6, 98.0, 61.3, 27.4, 14.1; m/z (ESI): 335  $[\text{M}+\text{Na}]^+$ , 295  $[\text{M}-\text{OH}]^+$ .

**Methyl 2-hydroxy-2-methyl-6-nitro-2H-chromene-3-carboxylate (table 3, 3ac):**

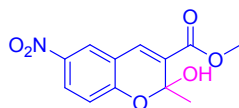

White solid; Mp 143-145 °C; IR:  $\nu_{\max}$  3386, 3068, 2984, 1698, 1615, 1507, 1338, 1267, 1053, 951, 772  $\text{cm}^{-1}$ ;  $^1\text{H}$  NMR (300 MHz,  $\text{CDCl}_3+\text{DMSO}$ ):  $\delta$  8.22 (dd,  $J_1 = 6.26$  Hz,  $J_2 = 2.59$  Hz, 1H), 8.19 (d,  $J = 2.59$  Hz, 1H), 7.63 (s, 1H), 7.06 (d,  $J = 8.85$  Hz, 1H), 3.98 (s, 3H), 3.80 (br-s, 1H), 2.02 (s, 3H);  $^{13}\text{C}$  NMR (75 MHz,  $\text{CDCl}_3+\text{DMSO}$ ):  $\delta$  163.7, 157.5, 140.7, 131.2, 127.7, 126.1, 123.4, 118.2, 116.4, 98.8, 51.2, 26.8; m/z (ESI): 288  $[\text{M}+\text{Na}]^+$ , 248  $[\text{M}-\text{OH}]^+$ .

**Ethyl 2-hydroxy-2-methyl-6-nitro-2H-chromene-3-carboxylate (table 3, 3ad):**

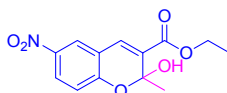

White solid; Mp 132-134 °C; IR:  $\nu_{\max}$  3402, 3071, 2993, 1696, 1612, 1519, 1343, 1276, 1076, 947, 774  $\text{cm}^{-1}$ ;  $^1\text{H}$  NMR (300 MHz,  $\text{CDCl}_3+\text{DMSO}$ ):  $\delta$  8.17-8.22 (m, 2H), 7.61 (m, 1H), 7.05 (d,  $J = 9.31$  Hz, 1H), 4.29-4.38 (m, 2H), 4.02-4.11 (br-s, 1H), 2.01 (s, 3H), 1.39 (t,  $J = 7.39$  Hz, 3H);  $^{13}\text{C}$  NMR (75 MHz,  $\text{CDCl}_3+\text{DMSO}$ ):  $\delta$  162.6, 157.0, 140.2, 130.4, 127.5, 125.6, 122.9, 117.9, 115.9, 98.3, 59.6, 26.2, 13.0; m/z (ESI): 262  $[\text{M}-\text{OH}]^+$ .

**Ethyl 6-bromo-2-hydroxy-2-isopropyl-2H-chromene-3-carboxylate (table 3, 3ae):**

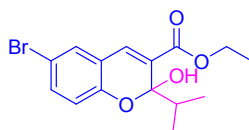

Semi solid; IR:  $\nu_{\max}$  3068, 2967, 2934, 1702, 1626, 1471, 1361, 1284, 1136, 1052, 915, 828, 768  $\text{cm}^{-1}$ ;  $^1\text{H}$  NMR (300 MHz,  $\text{CDCl}_3$ ):  $\delta$  7.47 (s, 1H), 7.38 (dd,  $J_1 = 8.69$  Hz,  $J_2 = 2.44$  Hz, 1H), 7.33 (d,  $J = 2.44$  Hz, 1H), 6.86 (d,  $J = 8.69$  Hz, 1H), 4.50 (br-s, 1H), 4.27-4.35 (m, 2H), 2.59 (m, 1H), 1.37 (t,  $J = 7.17$  Hz, 3H), 1.11 (d,  $J = 6.86$  Hz, 3H), 0.90 (d, 3H);  $^{13}\text{C}$  NMR (75 MHz,  $\text{CDCl}_3$ ):  $\delta$  165.8, 152.1, 134.8, 133.3, 130.8, 125.4, 120.4, 118.2, 113.2, 101.7, 61.4, 36.2, 17.4, 14.7, 14.1; m/z (ESI): 363  $[\text{M}+\text{Na}]^+$ , 323  $[\text{M}-\text{OH}]^+$ .

**Tert-butyl 6-chloro-2-hydroxy-2-methyl-2H-chromene-3-carboxylate (table 3, 3af):**



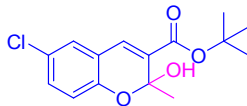

White solid; Mp 102-104 °C; IR:  $\nu_{\max}$  3409, 3077, 2965, 2918, 1701, 1639, 1469, 1355, 1282, 1133, 1067, 915, 812, 764  $\text{cm}^{-1}$ ;  $^1\text{H}$  NMR (300 MHz,  $\text{CDCl}_3$ ):  $\delta$  7.34 (s, 1H), 7.23 (dd,  $J_1 = 6.10$  Hz,  $J_2 = 2.59$  Hz, 1H), 7.20 (d,  $J = 2.44$  Hz, 1H), 6.89 (d,  $J = 8.54$  Hz, 1H), 4.04 (br-s, 1H), 1.99 (s, 3H), 1.56 (s, 9H);  $^{13}\text{C}$  NMR (75 MHz,  $\text{CDCl}_3 + \text{DMSO}$ ):  $\delta$  162.7, 150.7, 130.6, 130.0, 128.6, 126.6, 124.7, 120.0, 117.1, 97.3, 80.3, 27.3, 26.5; m/z (ESI): 319  $[\text{M} + \text{Na}]^+$ , 279  $[\text{M} - \text{OH}]^+$ .

**Tert-butyl 6-bromo-2-hydroxy-2-methyl-2H-chromene-3-carboxylate (table 3, 3ag):**

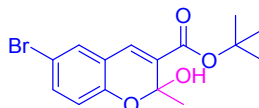

White solid; Mp 110-112 °C; IR:  $\nu_{\max}$  3412, 3061, 2974, 2927, 1700, 1632, 1480, 1367, 1293, 1148, 1071, 926, 816, 770  $\text{cm}^{-1}$ ;  $^1\text{H}$  NMR (300 MHz,  $\text{CDCl}_3$ ):  $\delta$  7.37 (dd,  $J_1 = 6.26$  Hz,  $J_2 = 2.29$  Hz, 1H), 7.35 (d,  $J = 2.29$  Hz, 1H), 7.34 (s, 1H), 6.85 (d,  $J = 8.39$  Hz, 1H), 4.01 (br-s, 1H), 1.99 (s, 3H), 1.56 (s, 9H);  $^{13}\text{C}$  NMR (75 MHz,  $\text{CDCl}_3 + \text{DMSO}$ ):  $\delta$  162.5, 150.9, 132.5, 130.2, 129.2, 128.3, 120.4, 117.3, 111.5, 96.9, 79.9, 27.0, 26.2; m/z (ESI): 363  $[\text{M} + \text{Na}]^+$ , 325  $[\text{M} - \text{OH}]^+$ .

**Tert-butyl 2-hydroxy-2-methyl-6-nitro-2H-chromene-3-carboxylate (table 3, 3ah):**

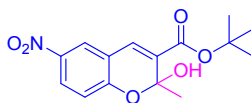

White solid; Mp 115-117 °C; IR:  $\nu_{\max}$  3311, 3046, 2968, 2911, 1704, 1619, 1475, 1363, 1288, 1137, 1084, 928, 808, 766  $\text{cm}^{-1}$ ;  $^1\text{H}$  NMR (300 MHz,  $\text{CDCl}_3$ ):  $\delta$  8.17-8.21 (m, 2H), 7.46 (s, 1H), 7.04 (d,  $J = 8.85$  Hz, 1H), 4.15 (br-s, 1H), 1.96 (s, 3H), 1.58 (s, 9H);  $^{13}\text{C}$  NMR (75 MHz,  $\text{CDCl}_3$ ):  $\delta$  163.8, 157.3, 141.9, 131.2, 128.9, 127.2, 124.2, 118.7, 117.2, 99.4, 82.8, 28.1; m/z (ESI): 330  $[\text{M} + \text{Na}]^+$ , 290  $[\text{M} - \text{OH}]^+$ .

**1-(6-chloro-2-hydroxy-2-methyl-2H-chromen-3-yl)ethanone (table 3, 3ai):**

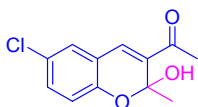

Yellow solid; Mp 93-95 °C; IR:  $\nu_{\max}$  3337, 3051, 2996, 2924, 1656, 1622, 1560, 1477, 1376, 1273, 1209, 1076, 935, 869  $\text{cm}^{-1}$ ;  $^1\text{H}$  NMR (300 MHz,  $\text{CDCl}_3$ ):  $\delta$  7.32 (s, 1H), 7.26-7.30 (m, 1H), 7.23 (d,  $J = 2.44$  Hz, 1H), 6.91 (d,  $J = 8.69$  Hz, 1H), 4.58 (br-s, 1H), 2.48 (s, 3H), 1.82 (s, 3H);  $^{13}\text{C}$  NMR (75 MHz,  $\text{CDCl}_3$ ):  $\delta$  198.1, 151.4, 133.9, 132.5, 128.0, 126.5, 120.0, 118.3, 98.9, 27.7, 26.6; m/z (ESI): 261  $[\text{M} + \text{Na}]^+$ , 221  $[\text{M} - \text{OH}]^+$ .

**1-(6-ethoxy-2-hydroxy-2-methyl-2H-chromen-3-yl)ethanone (table 3, 3aj):**

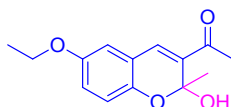

Yellow solid; Mp 143-145 °C; IR:  $\nu_{\max}$  3327, 3056, 2975, 2931, 1658, 1636, 1553, 1455, 1372, 1240, 1213, 1068, 941, 763  $\text{cm}^{-1}$ ;  $^1\text{H}$  NMR (300 MHz,  $\text{CDCl}_3$ ):  $\delta$  7.34 (s, 1H), 6.76-6.96 (m, 3H), 4.18 (br-s, 1H), 4.10 (q,  $J = 6.79$  Hz, 2H), 2.46 (s, 3H), 1.88 (s, 3H), 1.46 (t,  $J = 6.79$  Hz, 3H);  $^{13}\text{C}$  NMR (75 MHz,  $\text{CDCl}_3$ ):  $\delta$  197.8, 147.4, 142.9, 135.2, 133.1, 121.3, 120.9, 119.6, 117.4, 98.8, 65.0, 27.6, 26.6, 14.8;  $m/z$  (ESI); 271  $[\text{M}+\text{Na}]^+$ , 231  $[\text{M}-\text{OH}]^+$ .

**1-(6,8-dichloro-2-hydroxy-2-methyl-2H-chromen-3-yl)ethanone (table 3, 3ak):**

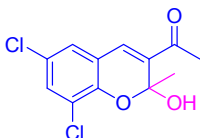

Yellow solid; Mp 123-125 °C; IR:  $\nu_{\max}$  3324, 3068, 2983, 2932, 1667, 1637, 1558, 1456, 1381, 1259, 1215, 1065, 926, 789  $\text{cm}^{-1}$ ;  $^1\text{H}$  NMR (300 MHz,  $\text{CDCl}_3$ ):  $\delta$  7.38 (d,  $J = 2.09$  Hz, 1H), 7.25 (s, 1H), 7.13 (s, 1H), 3.98 (br-s, 1H), 2.46 (s, 3H), 1.92 (s, 3H);  $^{13}\text{C}$  NMR (75 MHz,  $\text{CDCl}_3$ ):  $\delta$  197.4, 134.6, 132.7, 132.2, 126.5, 126.3, 122.7, 120.9, 99.6, 27.7, 26.7;  $m/z$  (ESI); 295  $[\text{M}+\text{Na}]^+$ , 255  $[\text{M}-\text{OH}]^+$ .

**1-(6,8-dibromo-2-hydroxy-2-methyl-2H-chromen-3-yl)ethanone (table 3, 3al):**

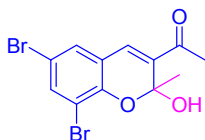

Yellow solid; Mp 138-140 °C; IR:  $\nu_{\max}$  3349, 3064, 2981, 2928, 1662, 1648, 1566, 1463, 1379, 1247, 1210, 1071, 945, 774  $\text{cm}^{-1}$ ;  $^1\text{H}$  NMR (300 MHz,  $\text{CDCl}_3$ ):  $\delta$  7.67 (d,  $J = 1.90$  Hz, 1H), 7.31 (s, 1H), 7.23 (s, 1H), 3.86 (br-s, 1H), 2.46 (s, 3H), 1.92 (s, 3H);  $^{13}\text{C}$  NMR (75 MHz,  $\text{CDCl}_3$ ):  $\delta$  197.3, 148.9, 137.7, 134.5, 132.7, 130.1, 121.4, 113.5, 111.8, 99.8, 27.8, 26.8;  $m/z$  (ESI); 383  $[\text{M}+\text{Na}]^+$ , 343  $[\text{M}-\text{OH}]^+$ .

**Ethyl 2-hydroxy-2-(trifluoromethyl)-2H-chromene-3-carboxylate (table 3, 3am):**

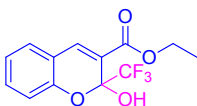

White solid; Mp 122-124 °C; IR:  $\nu_{\max}$  3236, 3064, 3011, 1688, 1623, 1454, 1283, 1176, 1035, 957, 829  $\text{cm}^{-1}$ ;  $^1\text{H}$  NMR (300 MHz,  $\text{CDCl}_3$ ):  $\delta$  7.78 (s, 1H), 7.51 (s, 1H), 7.36-7.40 (m, 1H), 7.24-7.27 (m, 1H), 7.01-7.05 (m, 1H), 4.36 (q,  $J = 7.17$  Hz, 2H), 1.40 (t,  $J = 7.17$  Hz, 3H);  $^{13}\text{C}$  NMR (75 MHz,  $\text{CDCl}_3$ ):  $\delta$  166.7, 152.5, 139.3, 133.8, 129.5, 124.5, 122.6, 120.7, 117.5, 115.9, 114.6, 62.4, 13.9;  $m/z$  (ESI); 311  $[\text{M}+\text{Na}]^+$ , 271  $[\text{M}-\text{OH}]^+$ .

**Ethyl 6-bromo-2-hydroxy-2-(trifluoromethyl)-2H-chromene-3-carboxylate (table 3, 3an):**

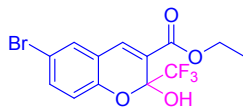

White solid; Mp 133-135 °C; IR:  $\nu_{\max}$  3247, 3071, 3000, 1684, 1629, 1478, 1288, 1172, 1033, 963, 825  $\text{cm}^{-1}$ ;  $^1\text{H}$  NMR (300 MHz,  $\text{CDCl}_3$ ):  $\delta$  7.69 (s, 1H), 7.44-7.50 (m, 2H), 7.39 (d,  $J = 2.27$  Hz, 1H), 6.94 (d,  $J = 9.06$  Hz, 1H),

4.38 (q,  $J = 6.79$  Hz, 2H), 1.40 (t,  $J = 6.79$  Hz, 3H);  $^{13}\text{C}$  NMR (75 MHz,  $\text{CDCl}_3$ ):  $\delta$  166.4, 151.5, 137.8, 136.3, 131.6, 124.3, 120.5, 119.2, 117.8, 115.9, 114.7, 62.7, 13.9;  $m/z$  (ESI); 389  $[\text{M}+\text{Na}]^+$ , 349  $[\text{M}-\text{OH}]^+$ .

**(6-bromo-2-hydroxy-2-methyl-2H-chromen-3-yl)(phenyl)methanone (table 3, 3ao):**

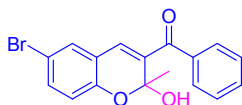

Semi solid; IR:  $\nu_{\text{max}}$  3376, 2935, 2864, 1703, 1628, 1552, 1455, 1271, 1250, 1168, 1063, 846, 687  $\text{cm}^{-1}$ ;  $^1\text{H}$  NMR (300 MHz,  $\text{CDCl}_3$ ):  $\delta$  7.80-7.84 (m,  $J = 7.17$  Hz, 2H), 7.62-7.66 (m, 1H), 7.51 (t,  $J = 7.48$  Hz, 2H), 7.42 (dd,  $J_1 = 8.69$  Hz,  $J_2 = 2.44$  Hz, 1H), 7.29 (d,  $J_1 = 2.44$  Hz, 1H), 6.91-6.94 (m, 2H), 4.25 (br-s, 1H), 1.92 (s, 3H);  $^{13}\text{C}$  NMR (75 MHz,  $\text{CDCl}_3$ ):  $\delta$  195.2, 151.5, 136.9, 134.9, 133.9, 133.4, 133.2, 130.8, 129.8, 128.6, 120.6, 118.9, 113.8, 98.3, 27.1;  $m/z$  (ESI); 367  $[\text{M}+\text{Na}]^+$ , 327  $[\text{M}-\text{OH}]^+$ .

**(6-bromo-2-hydroxy-2-phenyl-2H-chromen-3-yl)(phenyl)methanone (table 3, 3ap):**

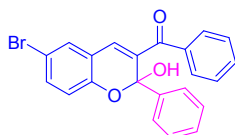

Semi solid; IR:  $\nu_{\text{max}}$  3413, 2924, 2854, 1701, 1633, 1565, 1475, 1289, 1246, 1173, 1067, 851, 692  $\text{cm}^{-1}$ ;  $^1\text{H}$  NMR (300 MHz,  $\text{CDCl}_3$ ):  $\delta$  7.74-7.78 (m, 2H), 7.63-7.67 (m, 2H), 7.57-7.61 (m, 1H), 7.42-7.48 (m, 3H), 7.26-7.36 (m, 4H), 7.08 (s, 1H), 6.92 (d,  $J = 8.54$  Hz, 1H), 5.04 (s, 1H);  $^{13}\text{C}$  NMR (75 MHz,  $\text{CDCl}_3$ ):  $\delta$  194.9, 150.9, 142.1, 136.1, 135.2, 133.5, 133.4, 133.0, 130.8, 129.8, 128.8, 128.6, 128.2, 125.8, 119.7, 118.8, 113.9, 99.1;  $m/z$  (ESI); 429  $[\text{M}+\text{Na}]^+$ , 389  $[\text{M}-\text{OH}]^+$ .

8.559  
8.540  
7.941  
7.804  
7.574  
7.556  
7.375  
7.351  
7.330  
7.064  
7.040  
7.015  
6.952  
6.923

4.116  
4.093  
4.080  
4.069  
4.057  
4.033  
4.023  
4.009  
3.998  
3.975  
3.963  
3.951  
3.939  
3.915

1.078  
1.054  
1.030

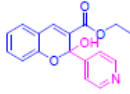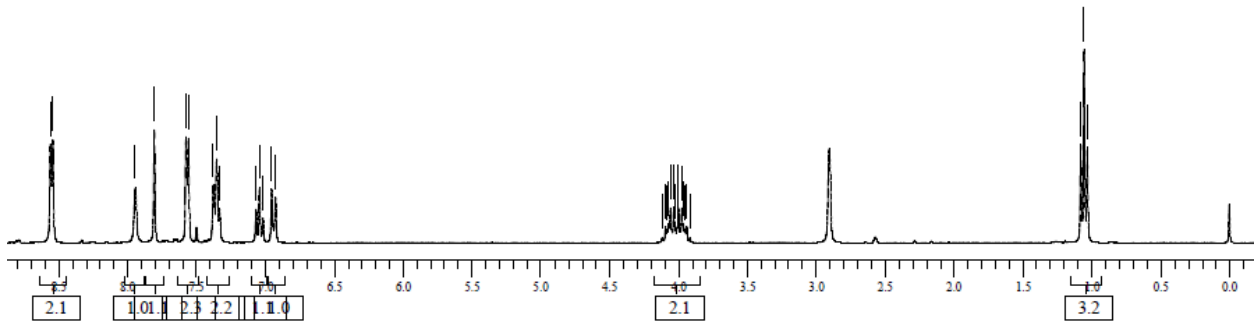

163.735  
151.862  
151.774  
148.472  
134.366  
131.997  
128.376  
124.927  
121.377  
121.078  
118.053  
116.246

97.044

60.230

13.367

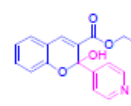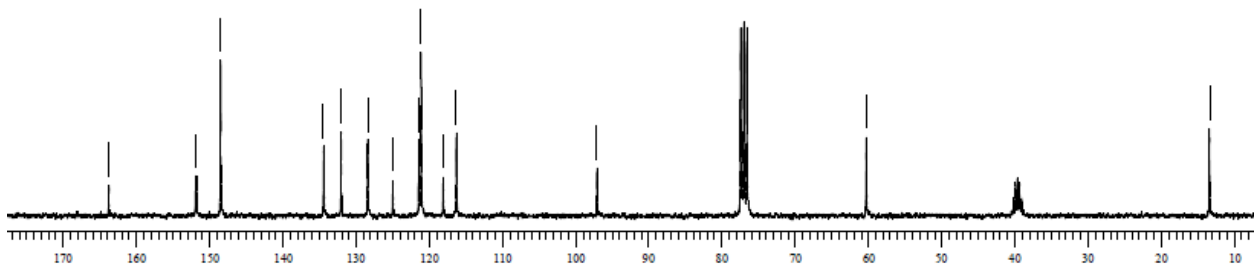



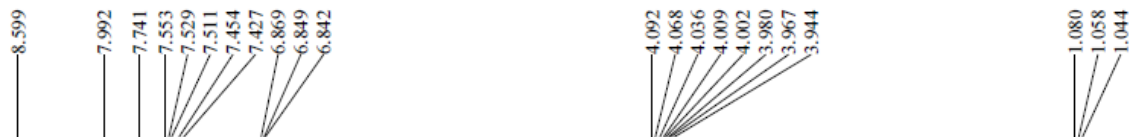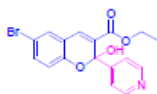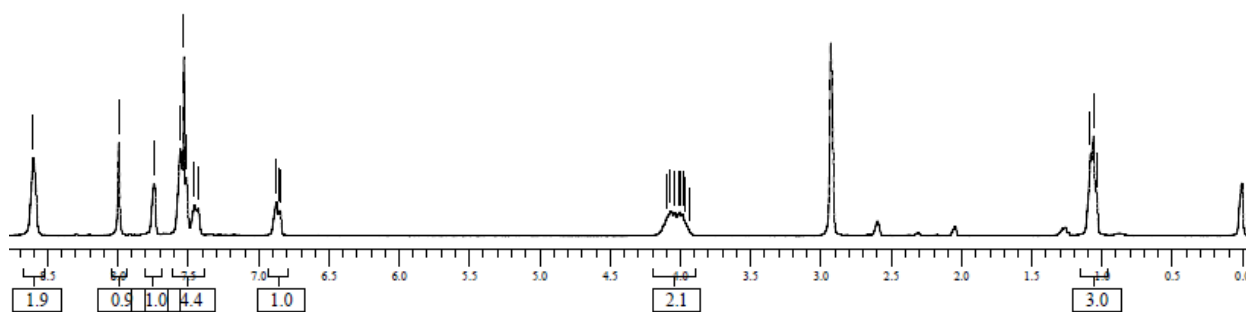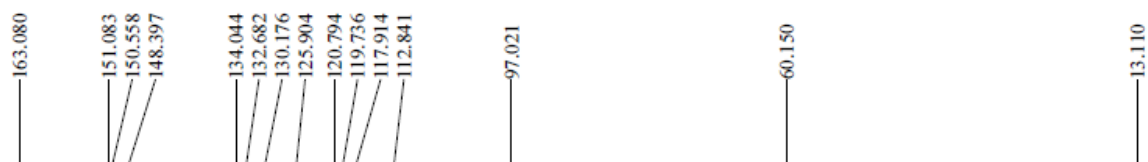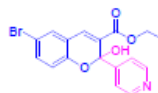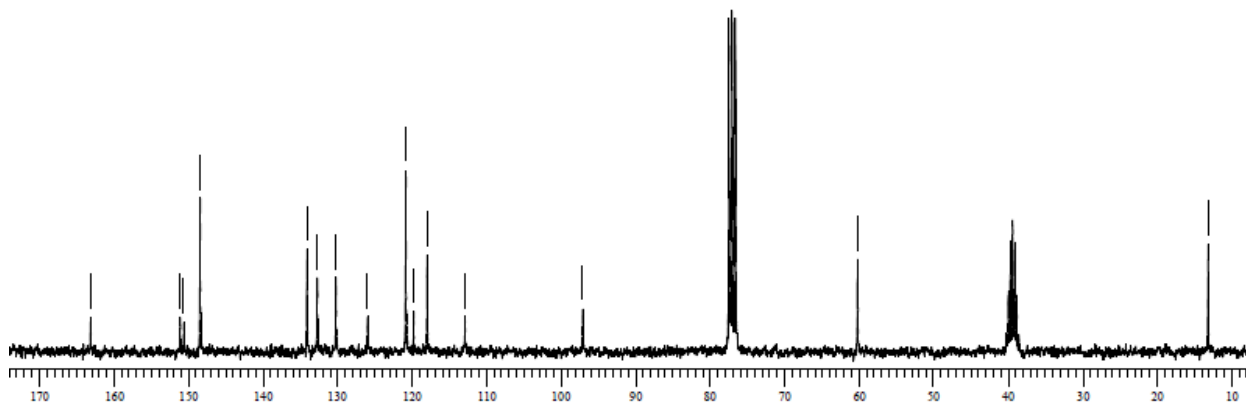

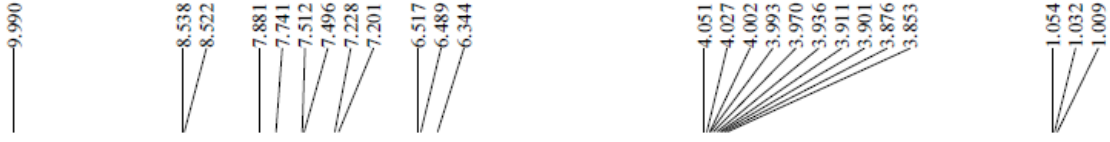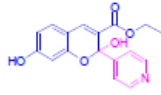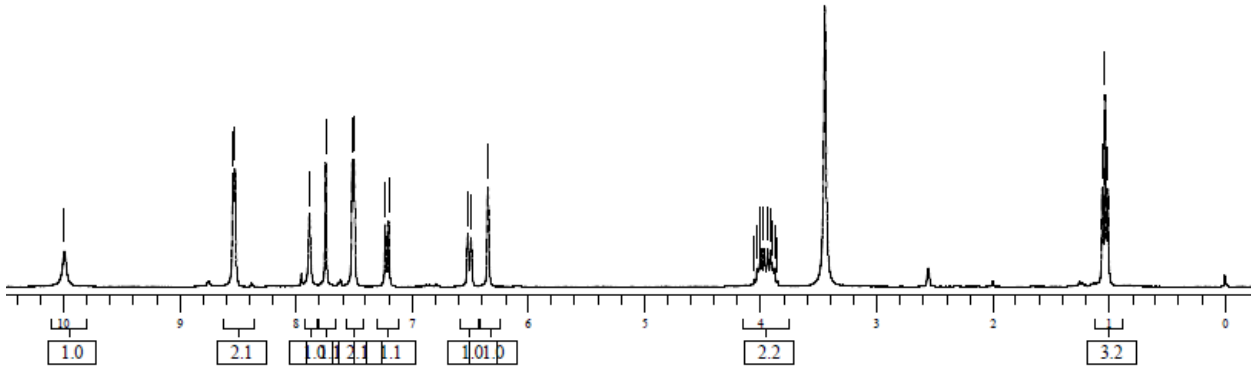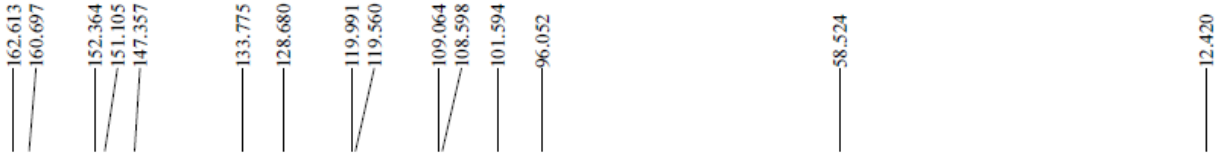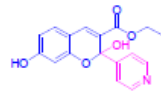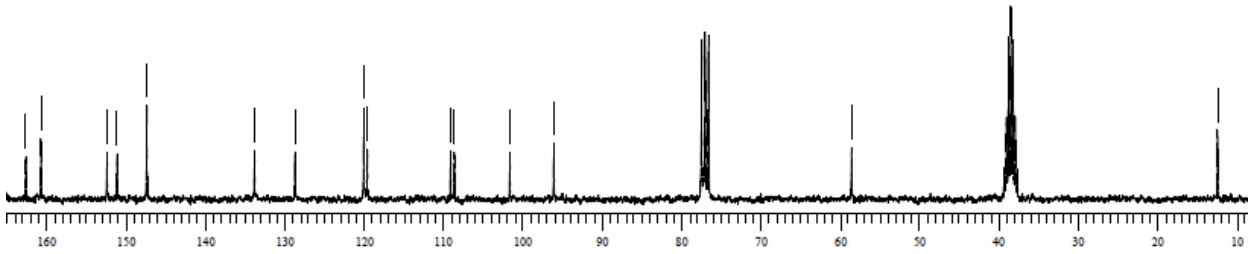

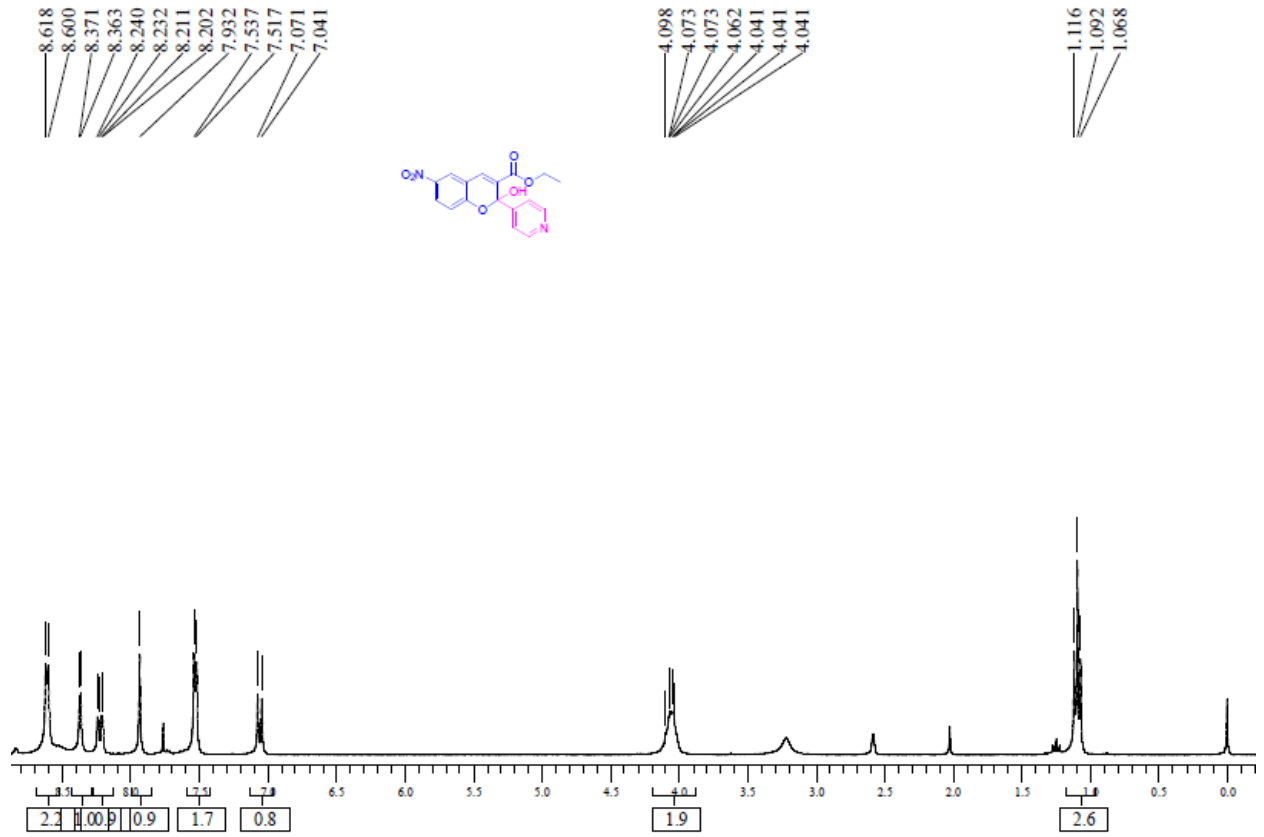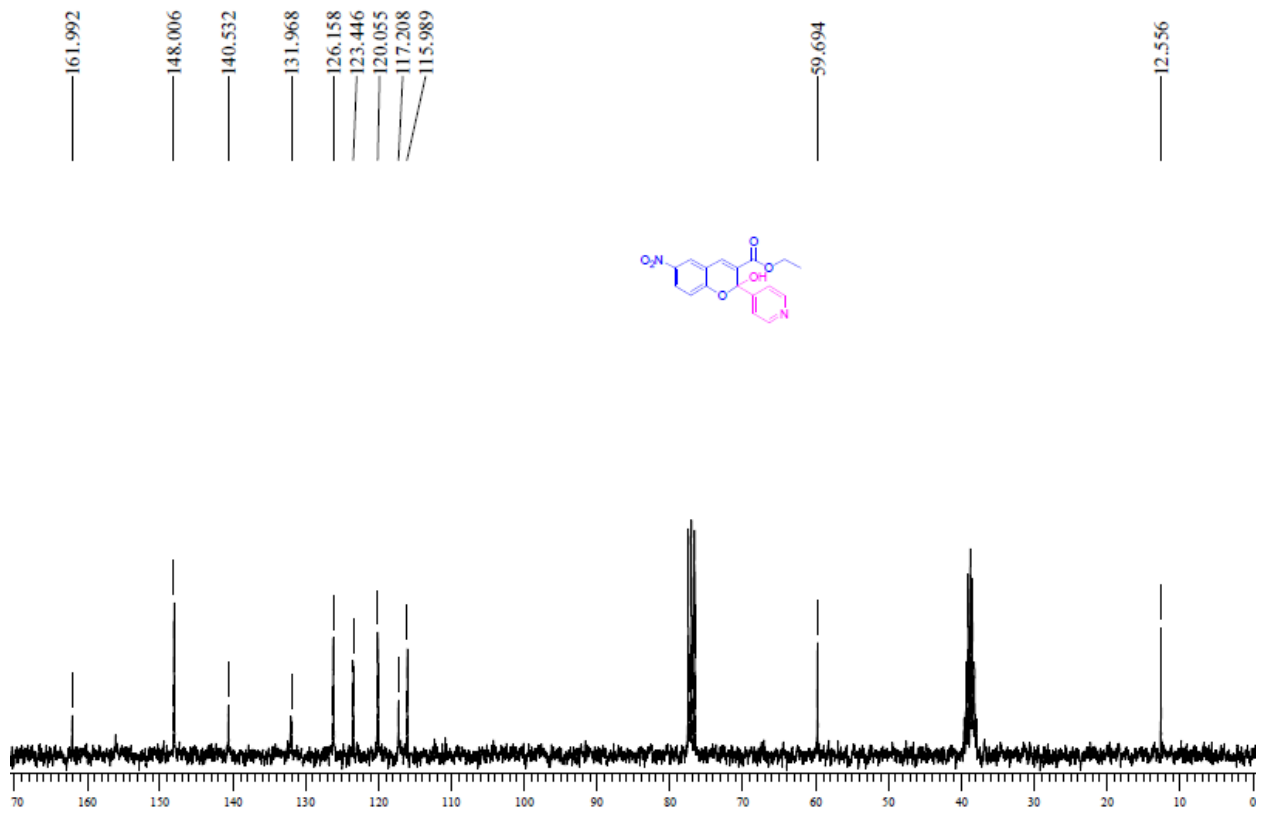



8.593  
8.581  
8.357  
7.719  
7.552  
7.411  
7.407  
7.313  
7.308

4.045  
4.006  
4.006

1.082  
1.068  
1.054

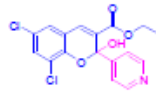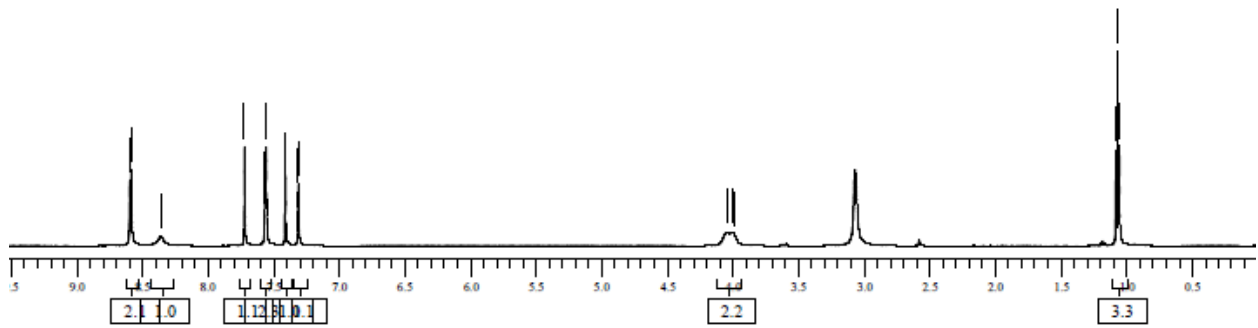

162.628  
150.310  
148.291  
146.108  
132.070  
130.809  
126.667  
125.808  
125.275  
121.457  
120.880  
120.057

60.181

12.988

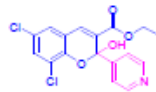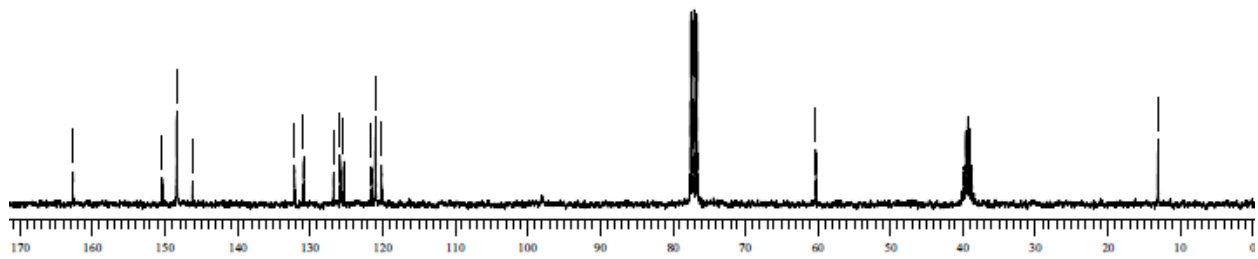

8.585  
8.491  
8.438  
8.381  
7.729  
7.695  
7.695  
7.545  
7.539

4.014

1.088  
1.064  
1.040

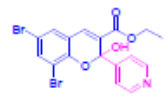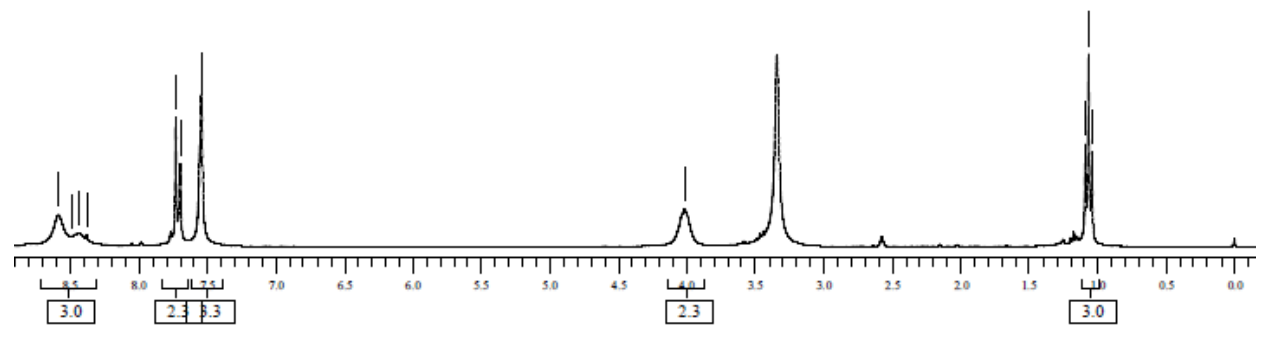

162.578  
150.351  
148.254  
147.641  
136.219  
132.019  
129.367  
126.558  
120.873  
120.494  
112.563  
110.603

60.179

13.001

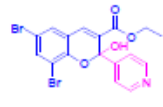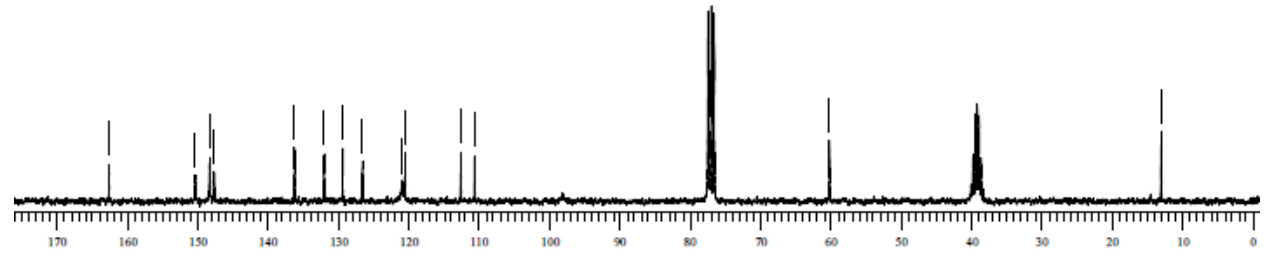

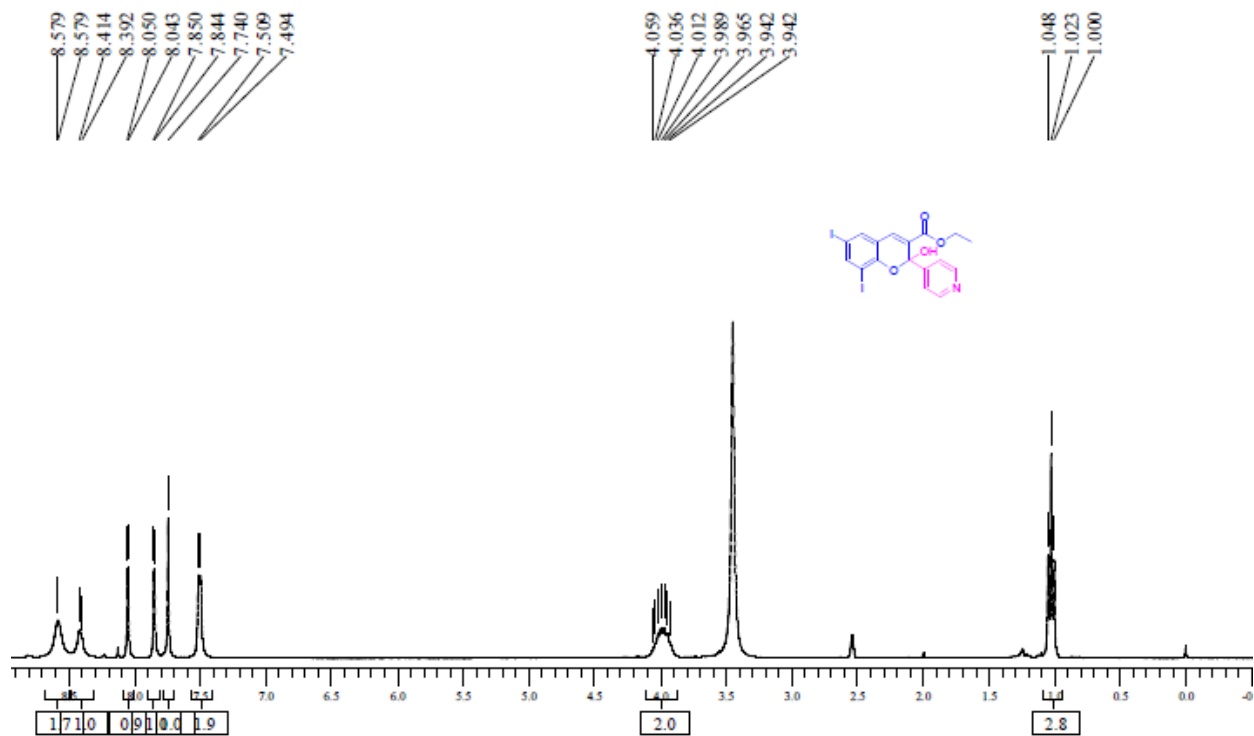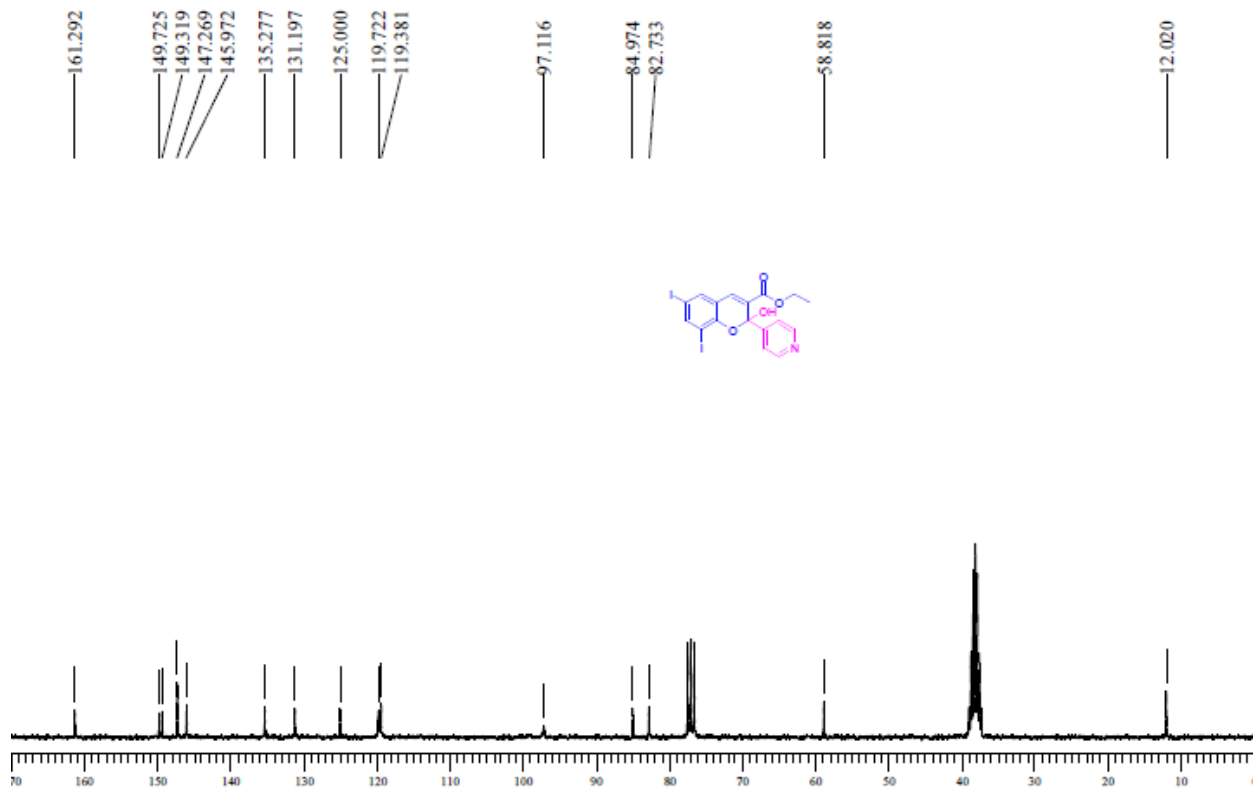

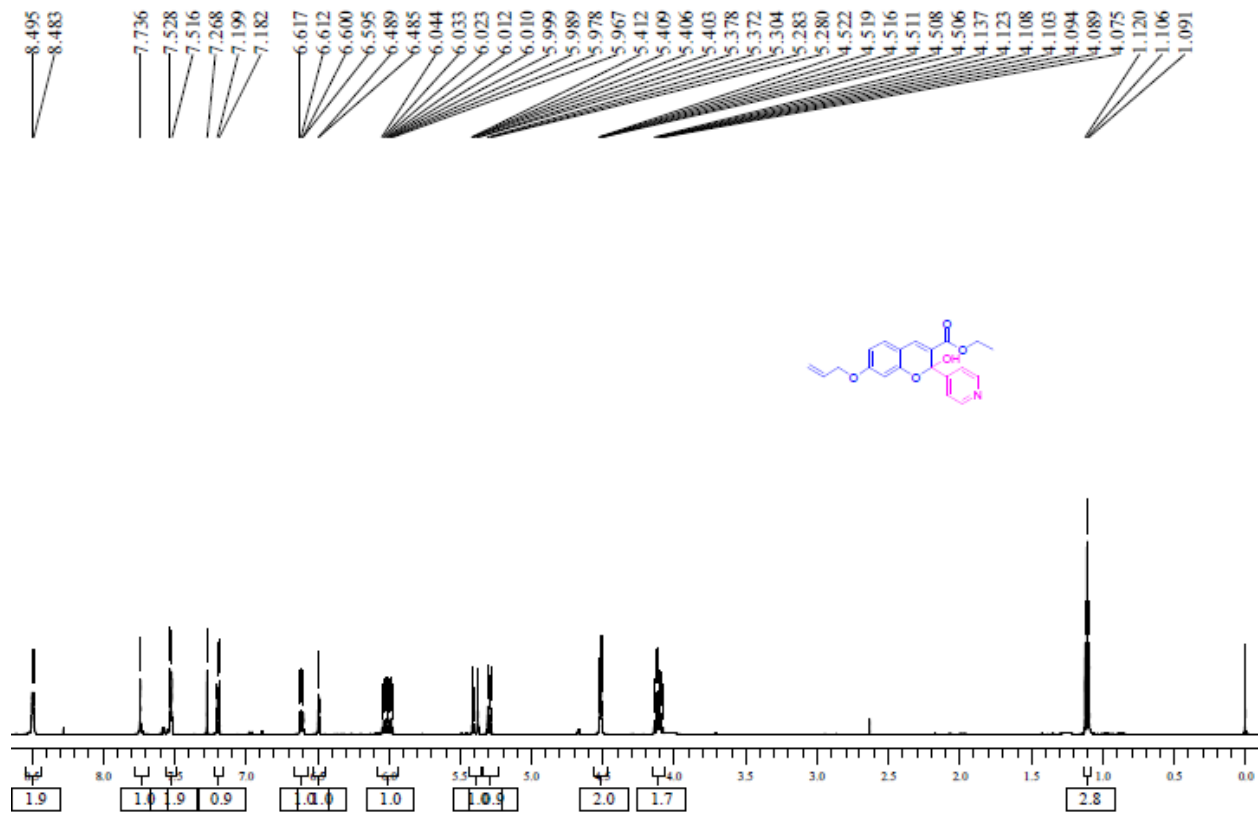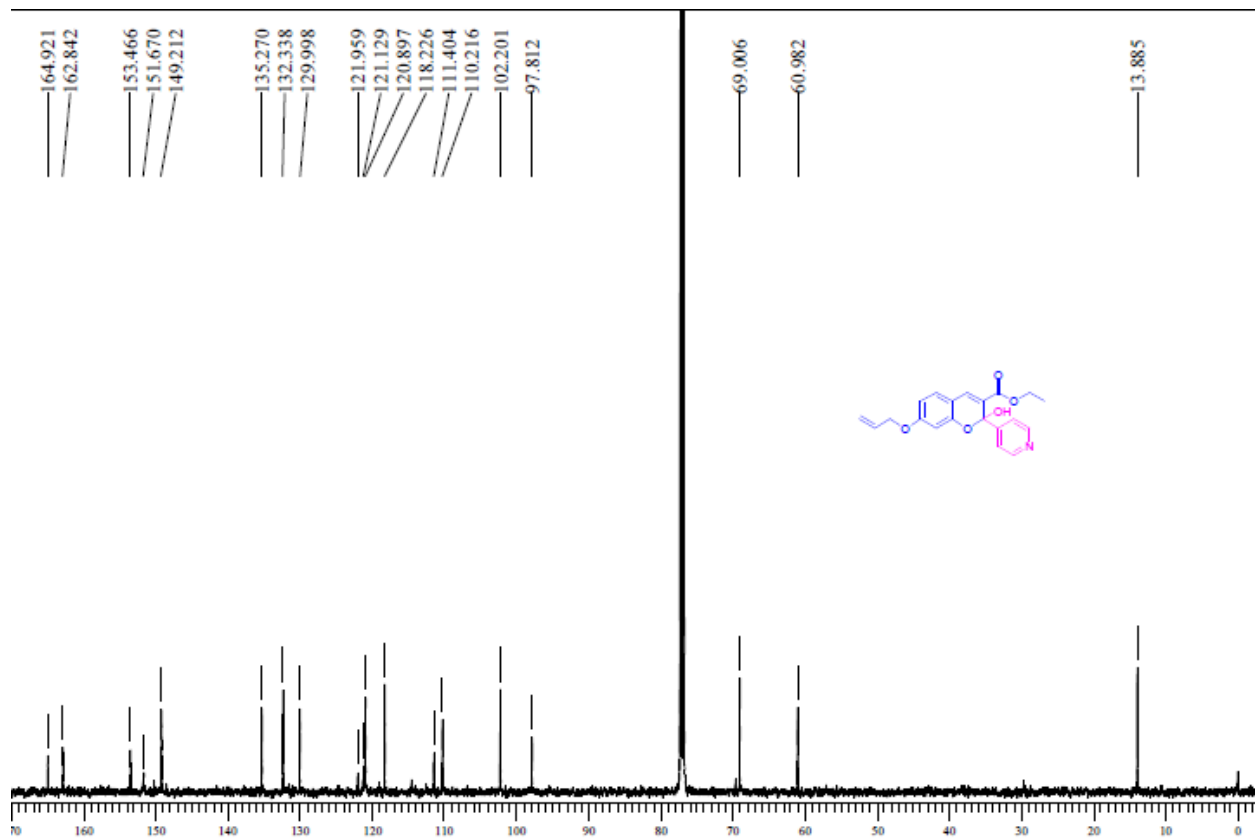

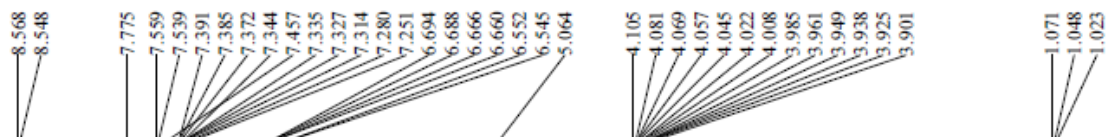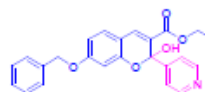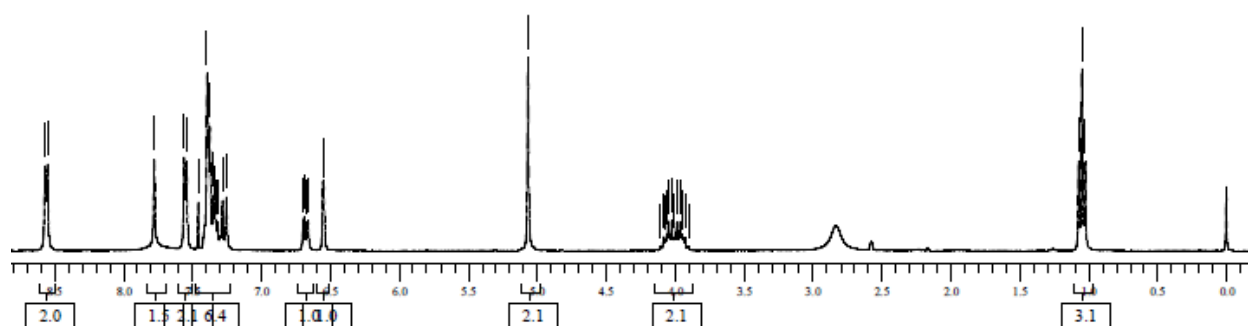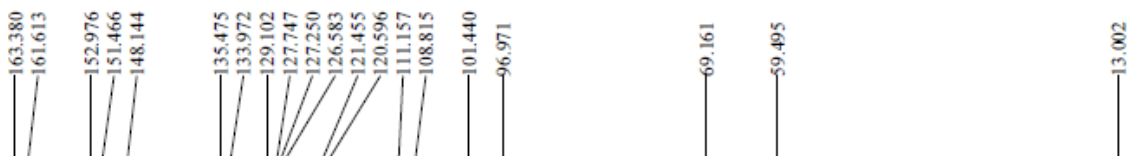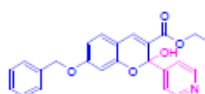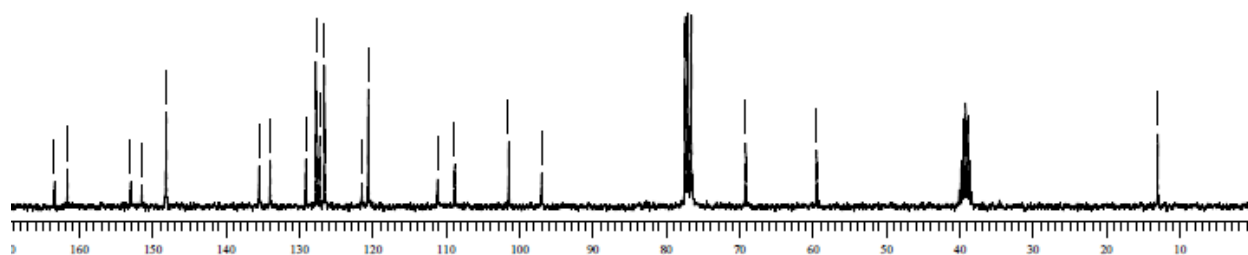

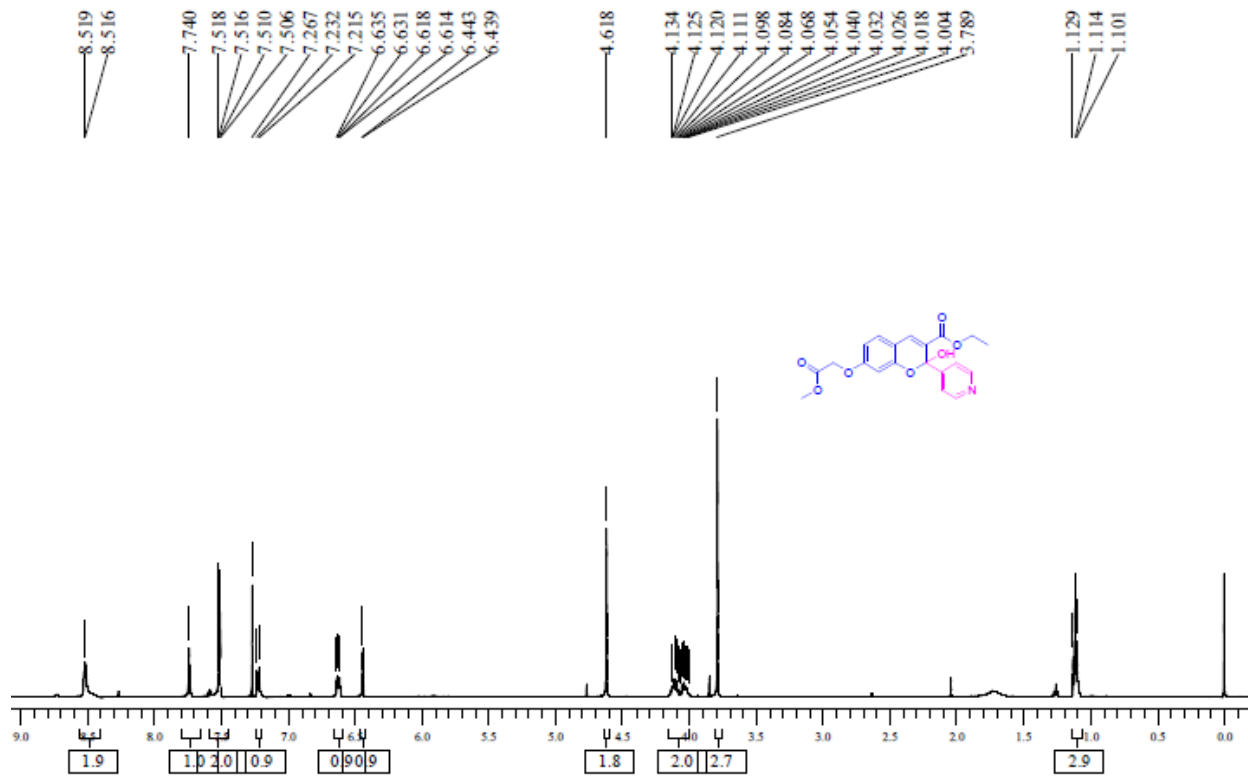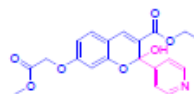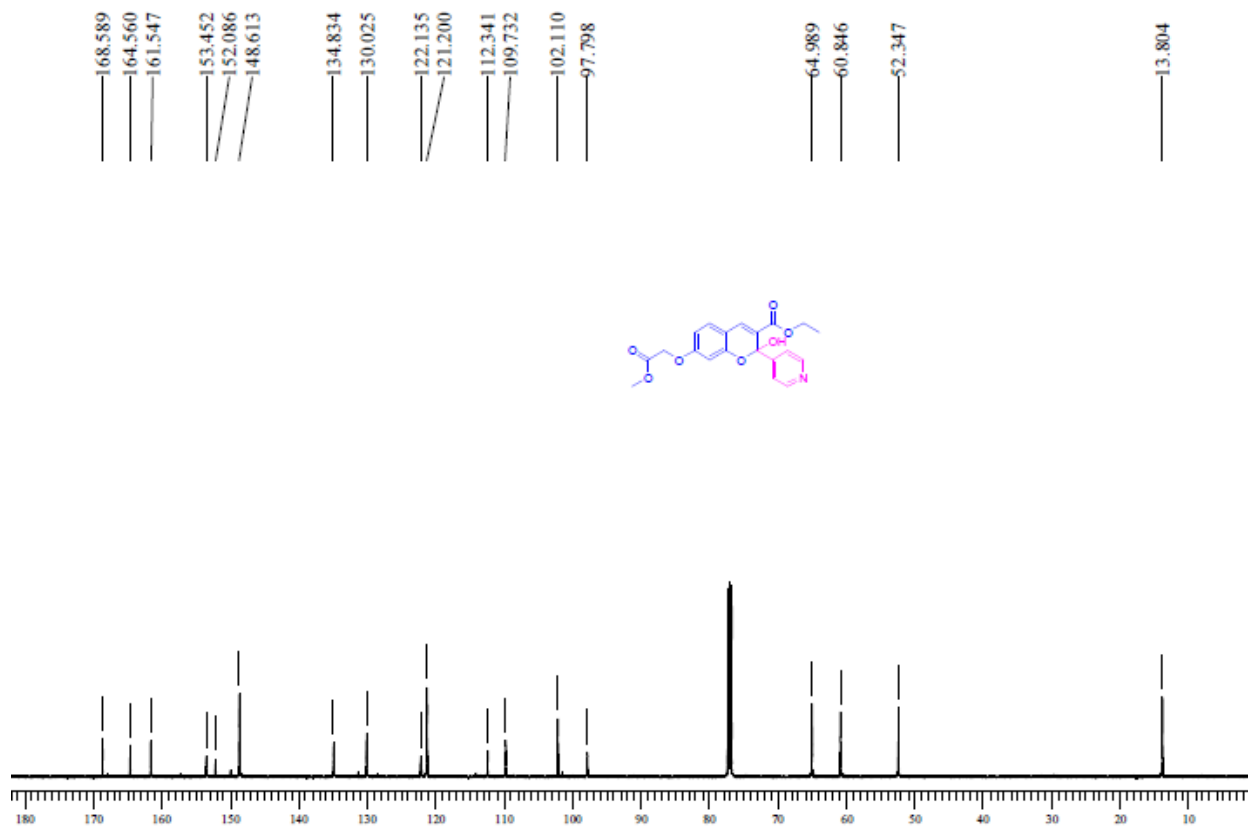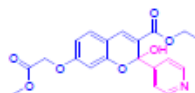

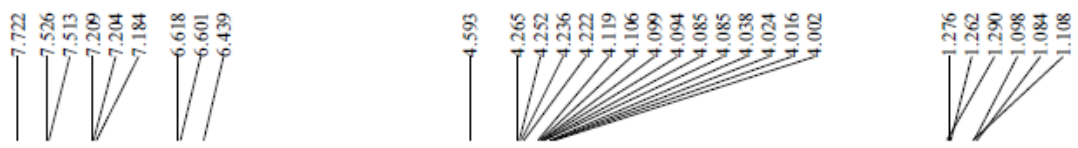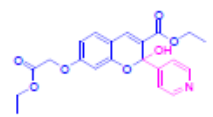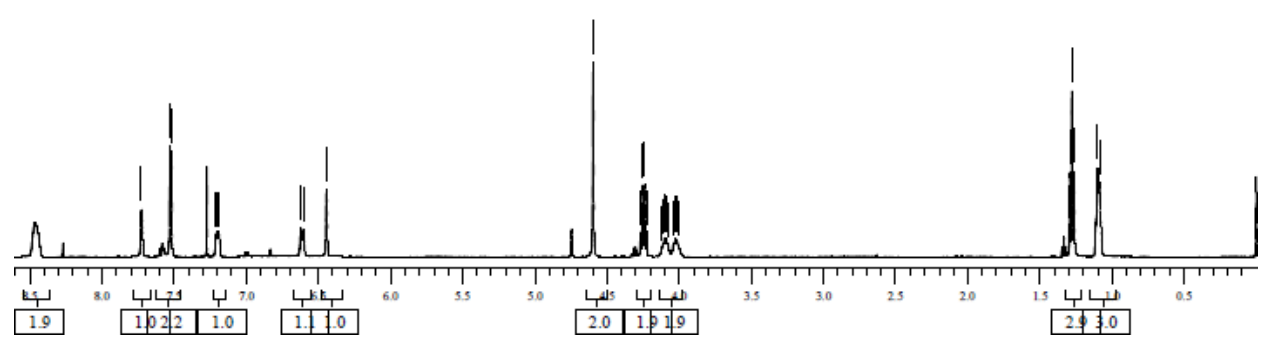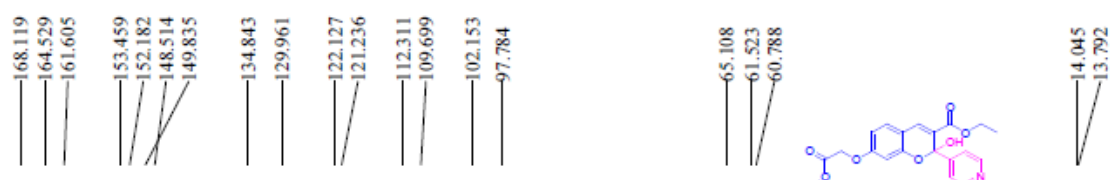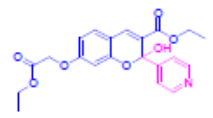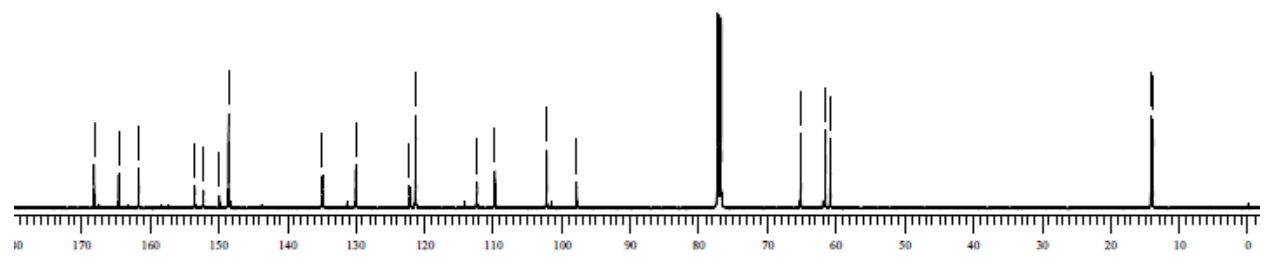

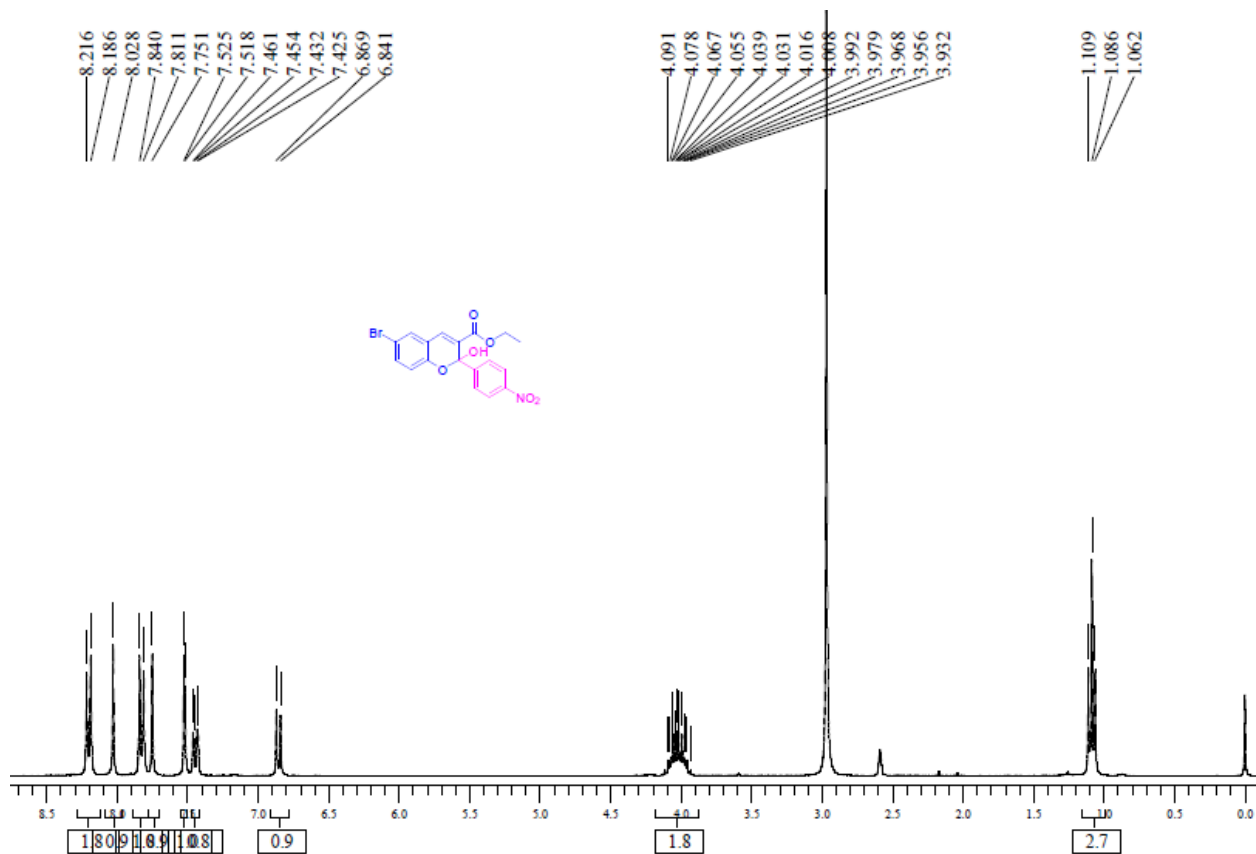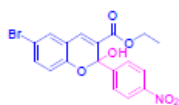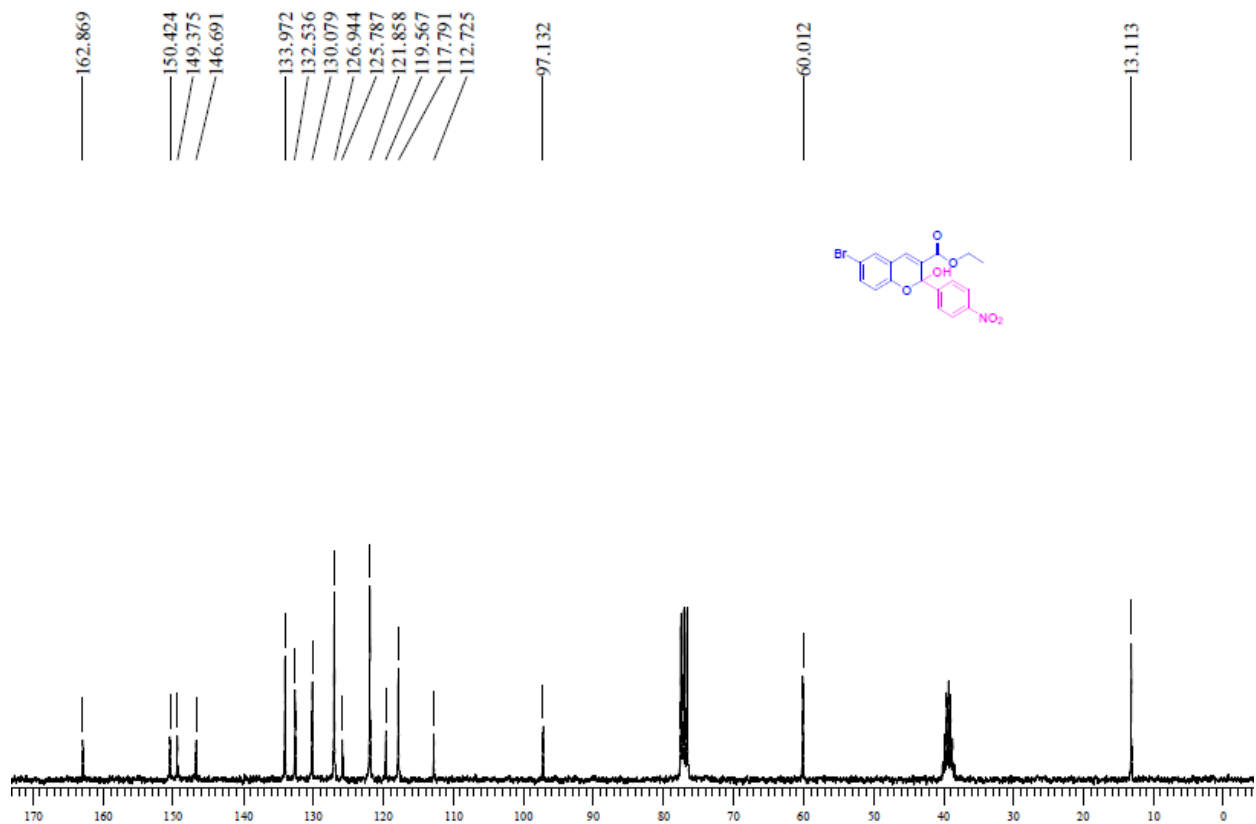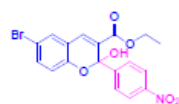



8.215  
8.185  
8.022  
7.843  
7.814  
7.755  
7.386  
7.378  
7.327  
7.319  
7.298  
7.290  
6.918  
6.889

4.090  
4.078  
4.066  
4.054  
4.039  
4.031  
4.016  
4.007  
3.992  
3.979  
3.969  
3.956  
3.932

1.111  
1.087  
1.064

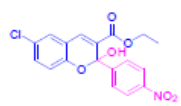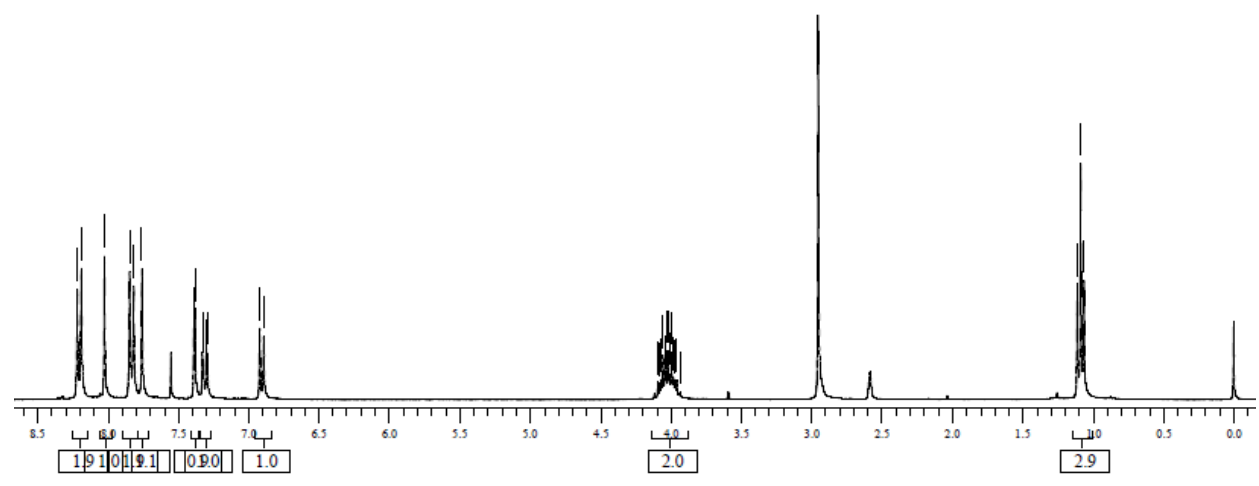

162.789  
149.863  
149.348  
146.614  
132.567  
131.051  
127.062  
126.888  
125.773  
125.466  
121.771  
118.933  
117.293  
97.065  
59.919  
13.055

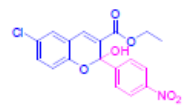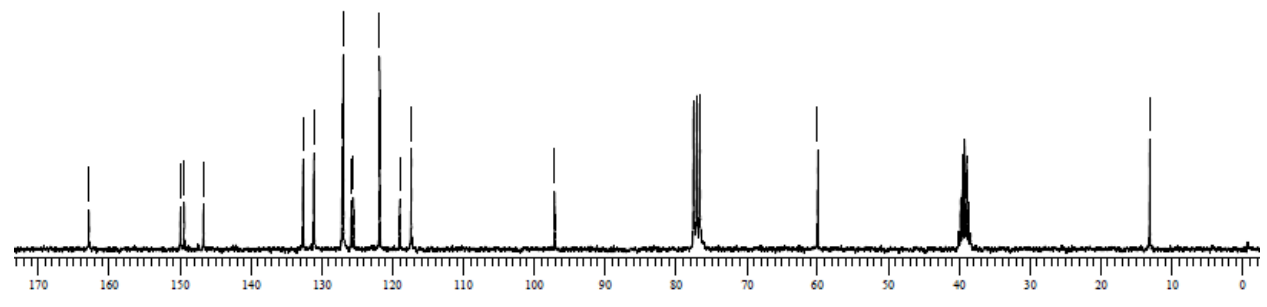

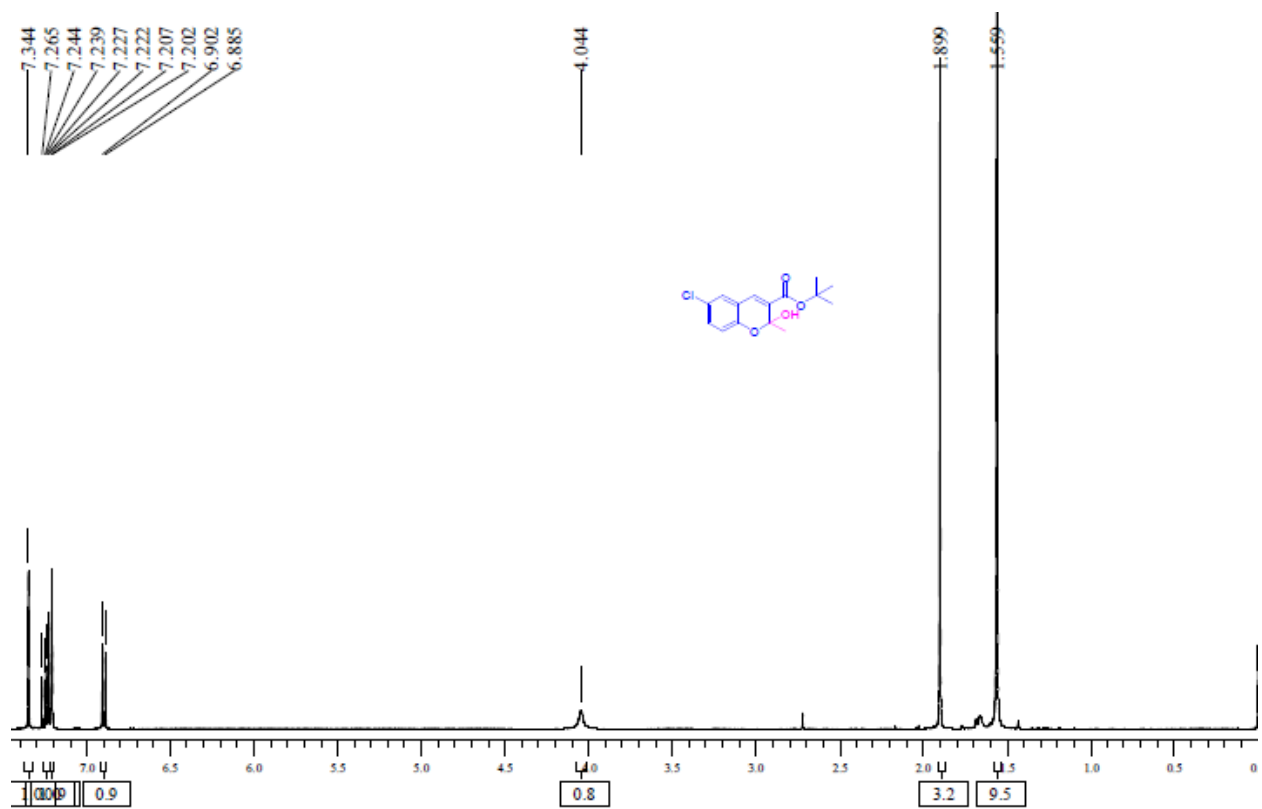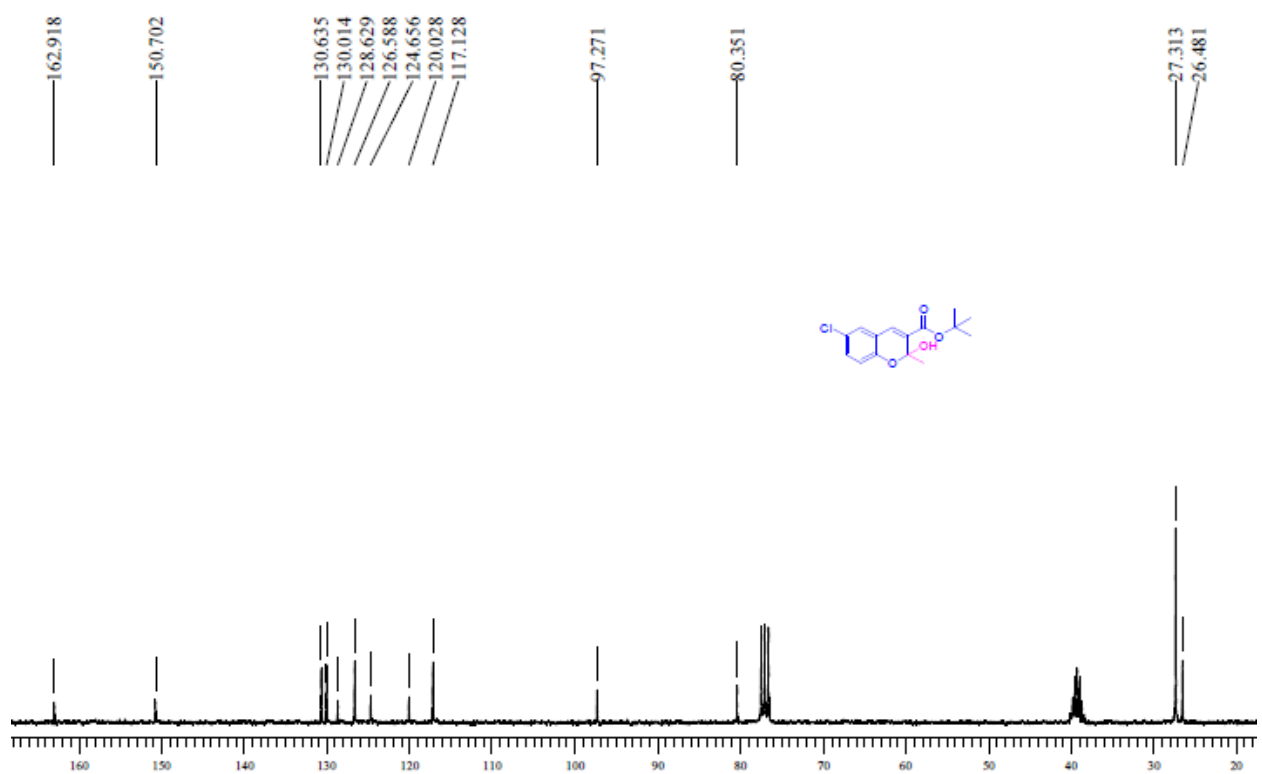

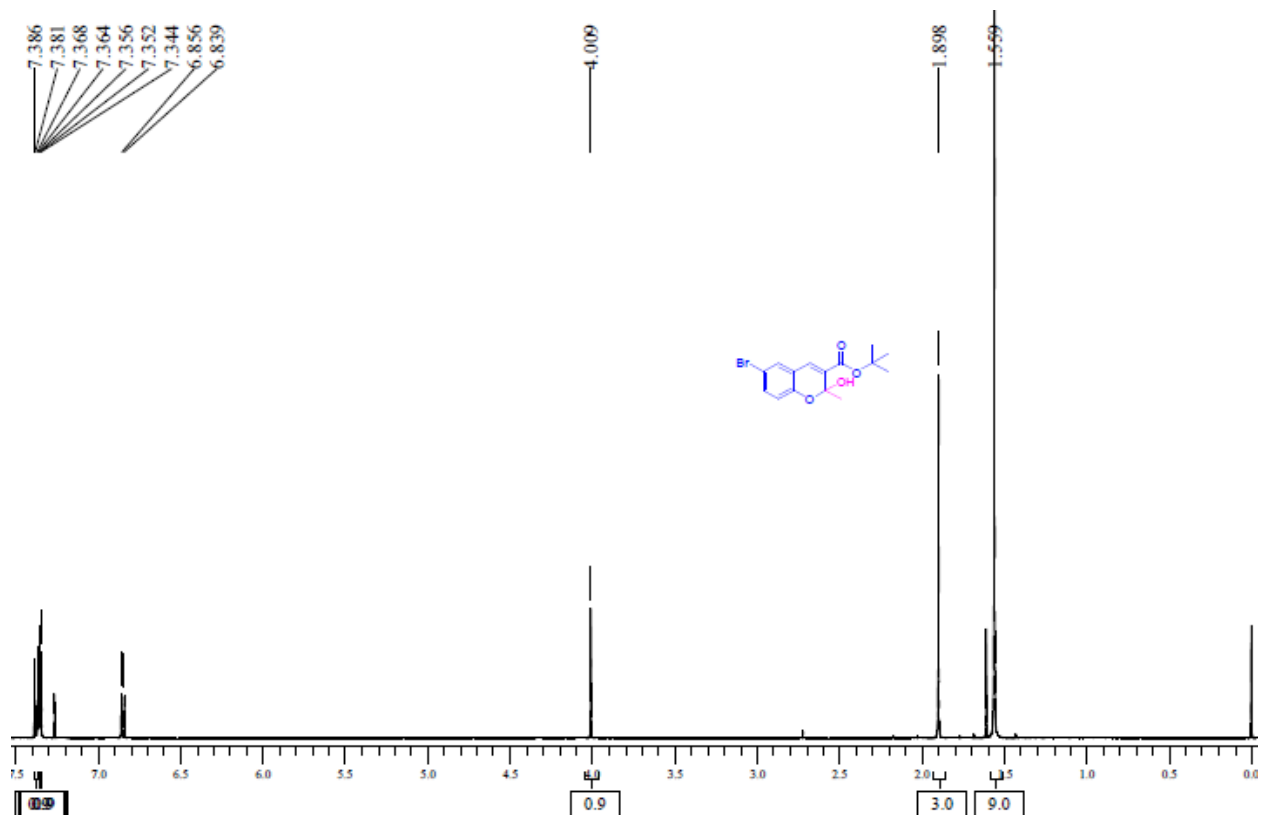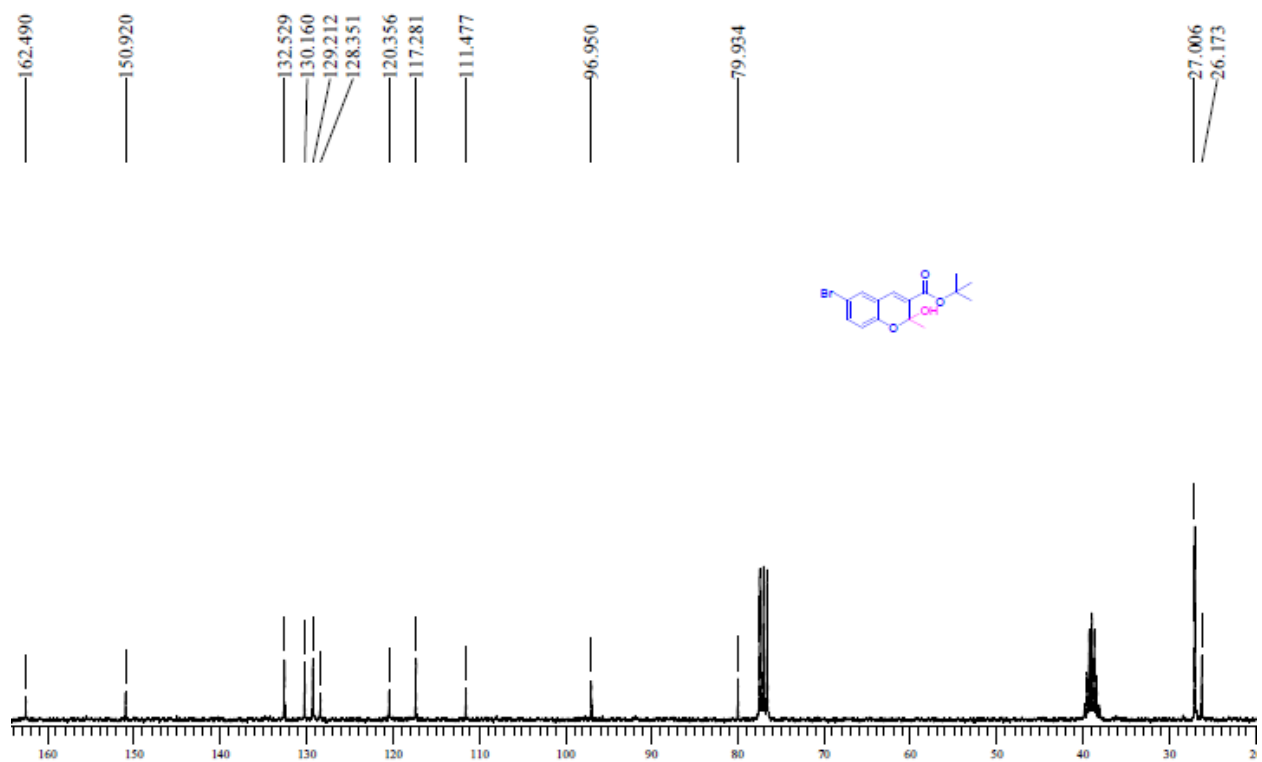

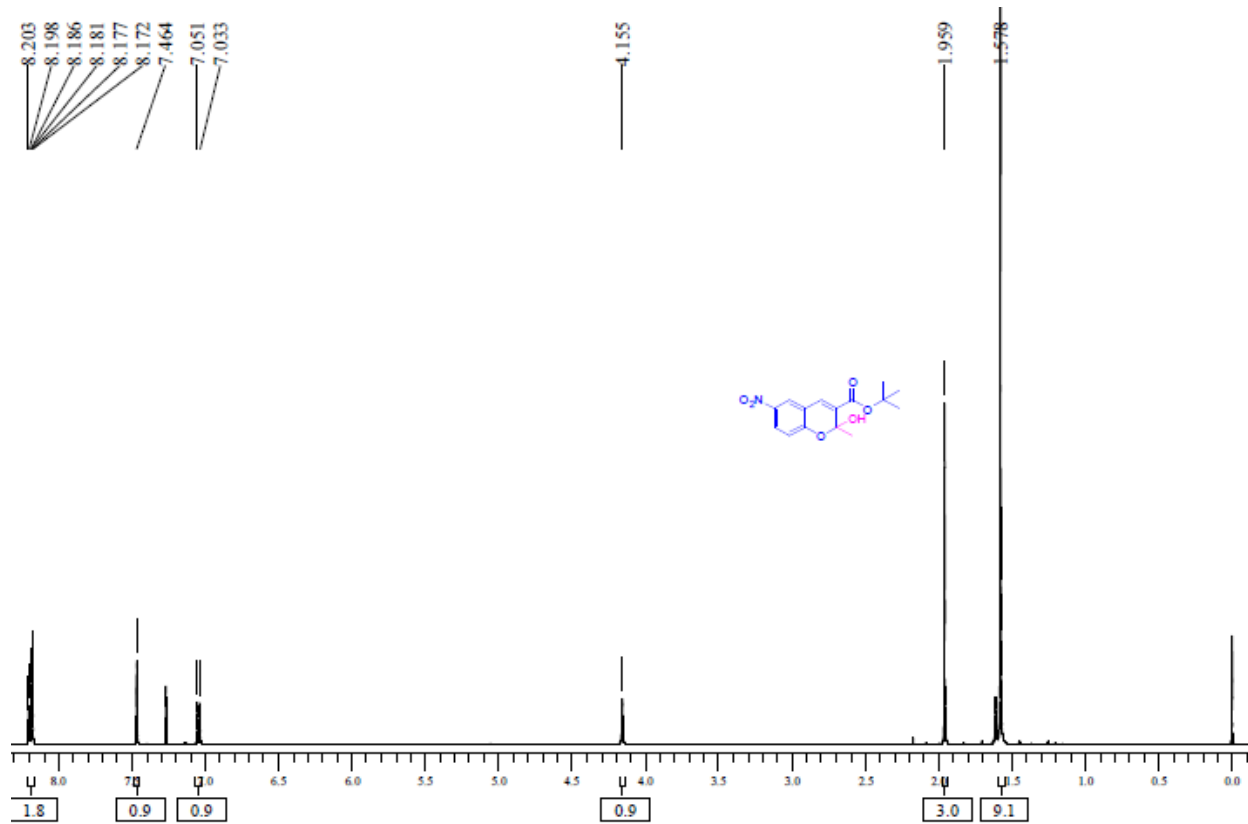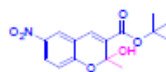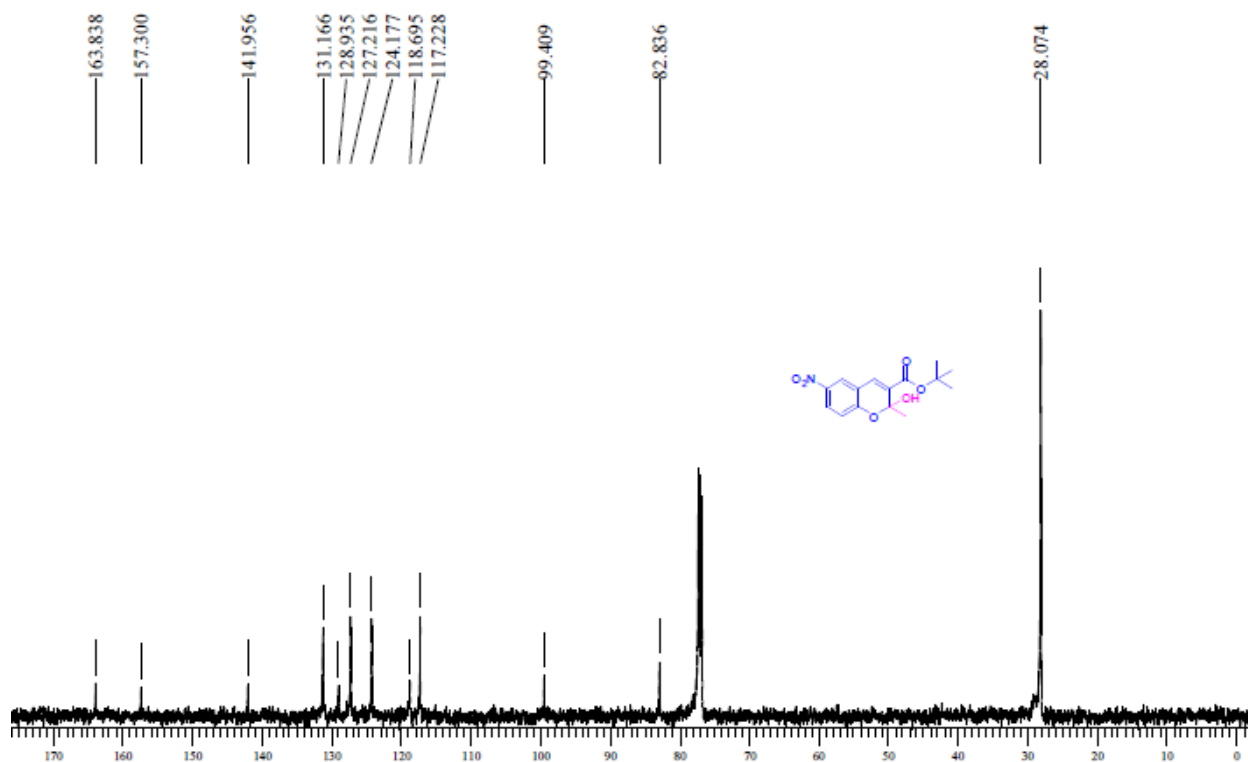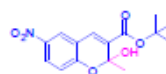

7.475  
7.391  
7.386  
7.373  
7.369  
7.337  
7.333  
6.865  
6.848

4.503  
4.343  
4.335  
4.329  
4.321  
4.315  
4.307  
4.300  
4.293  
4.286  
4.279

2.615  
2.601  
2.588  
2.574  
2.561

1.383  
1.369  
1.354  
1.113  
1.099  
0.906  
0.893

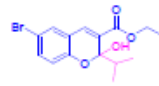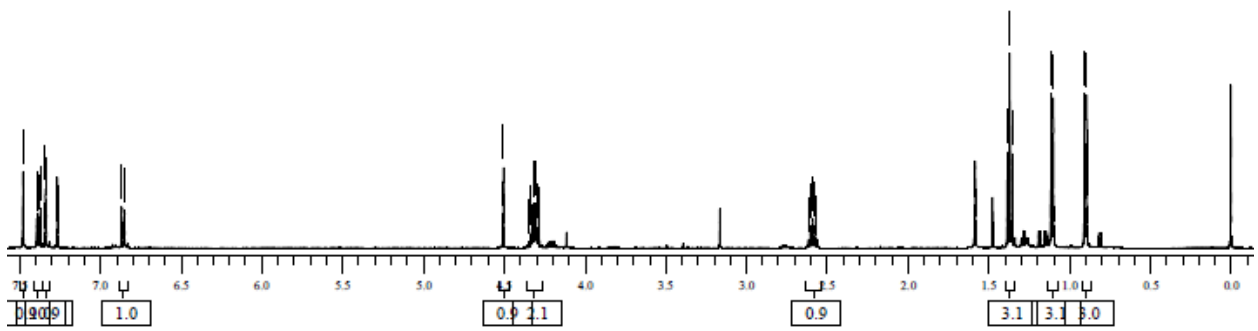

165.785  
152.130  
134.813  
133.324  
130.778  
125.433  
120.372  
118.212  
113.229  
101.747  
61.453  
36.212  
17.379  
14.707  
14.139

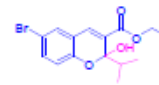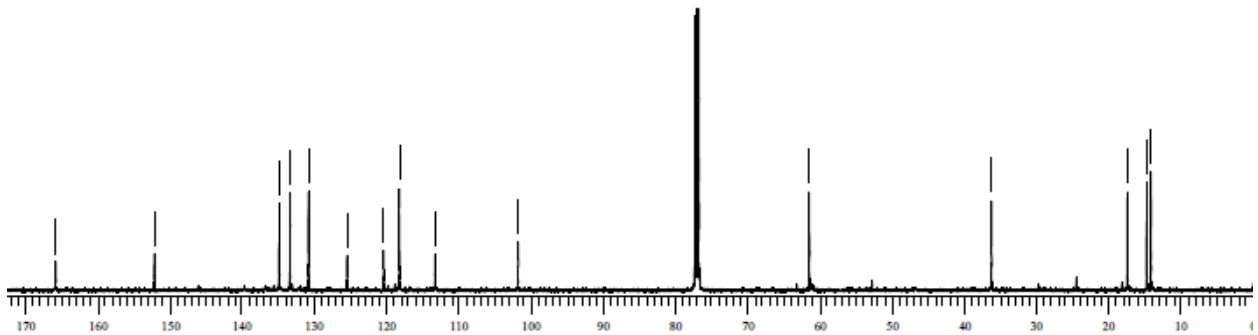

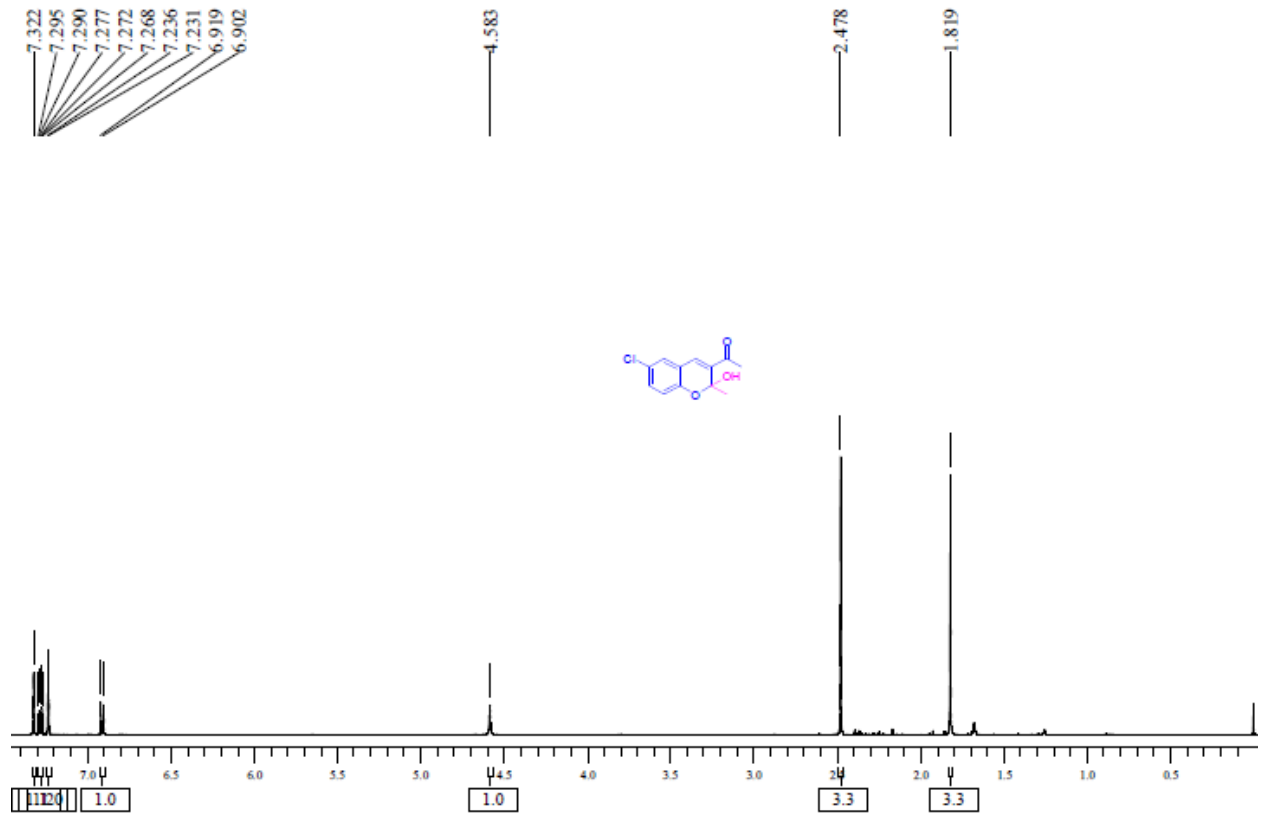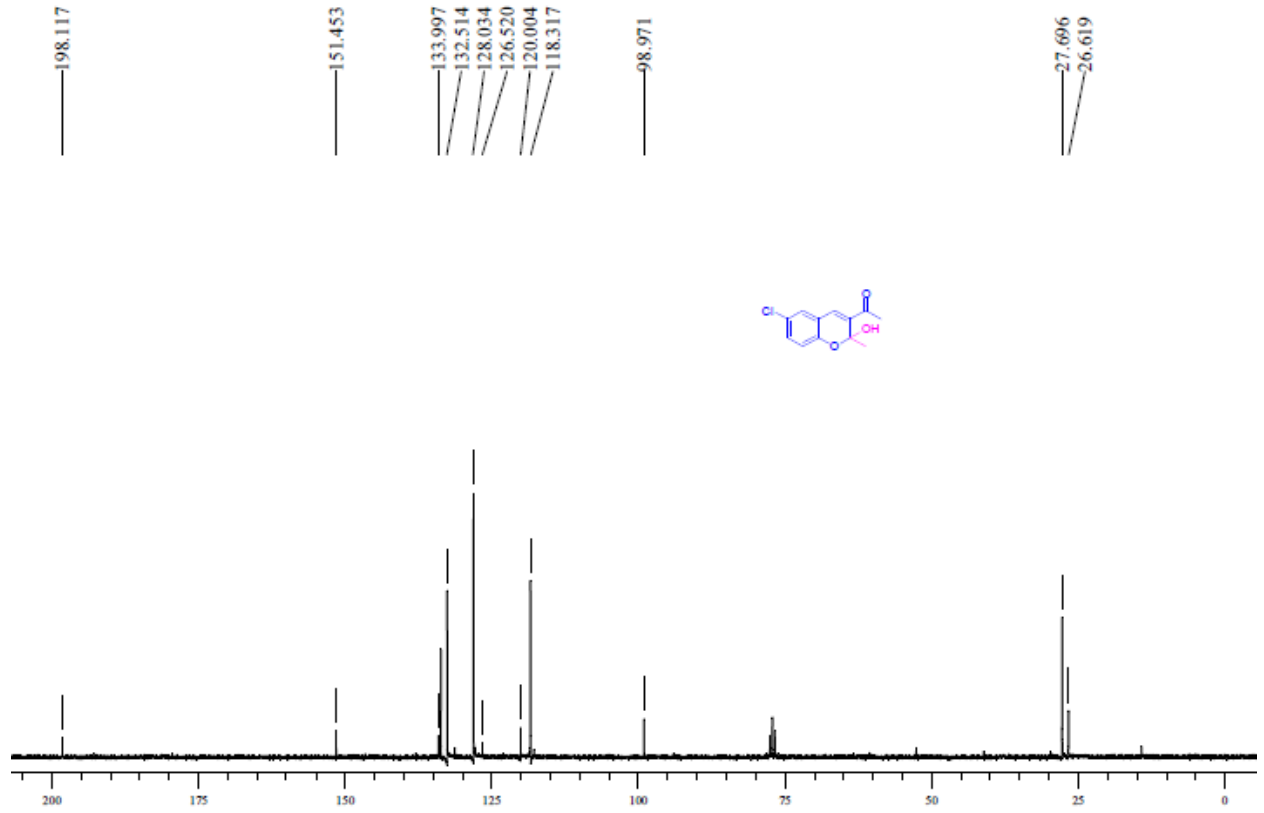

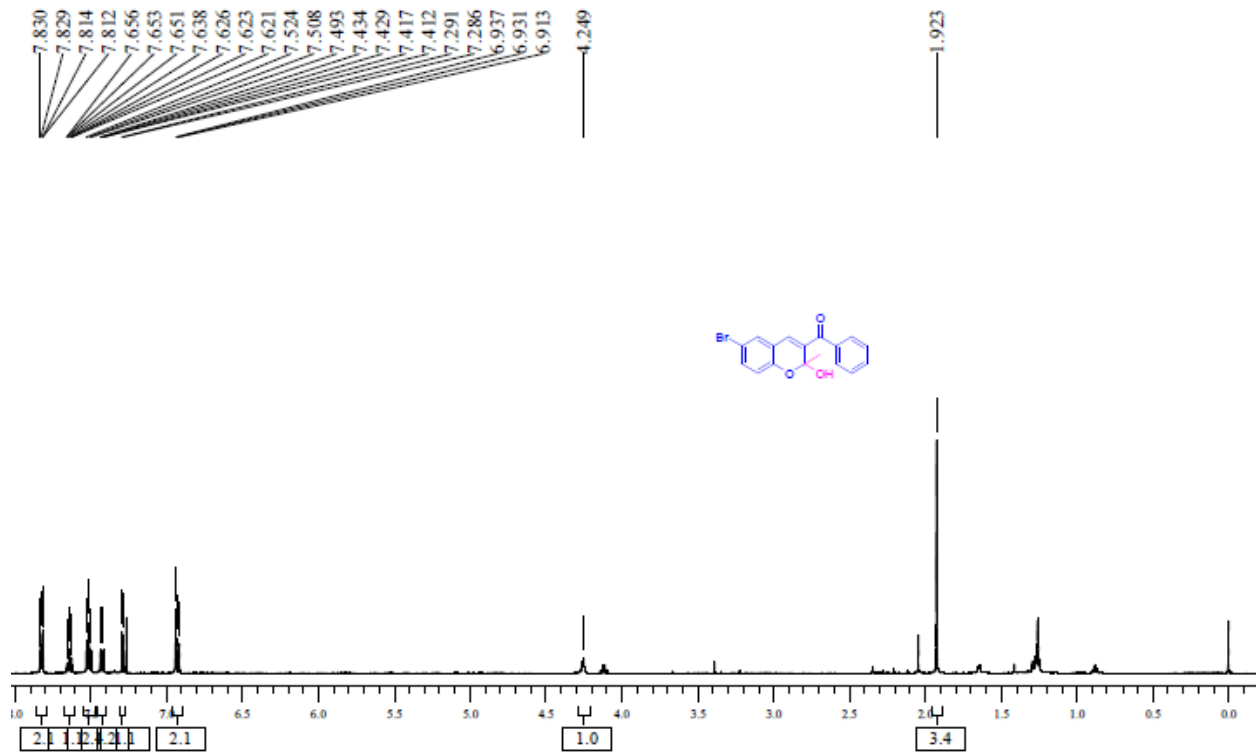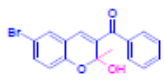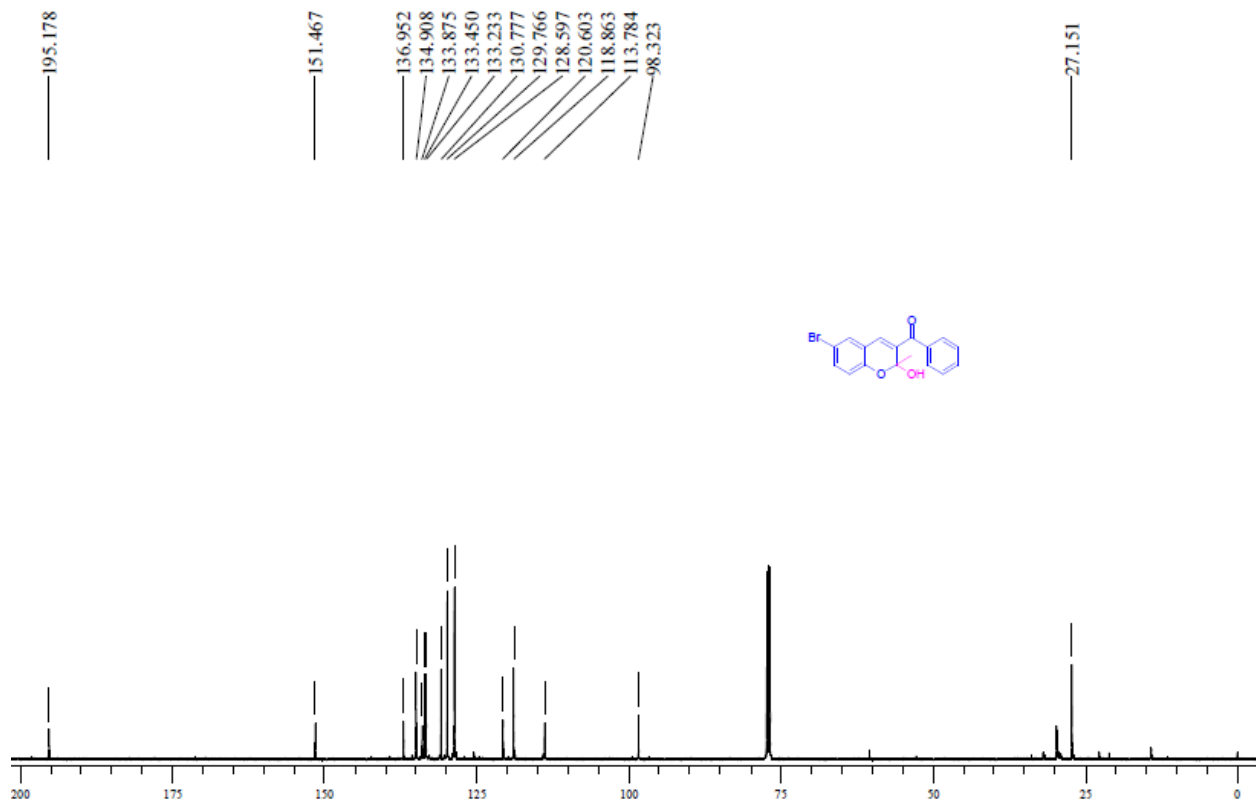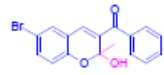

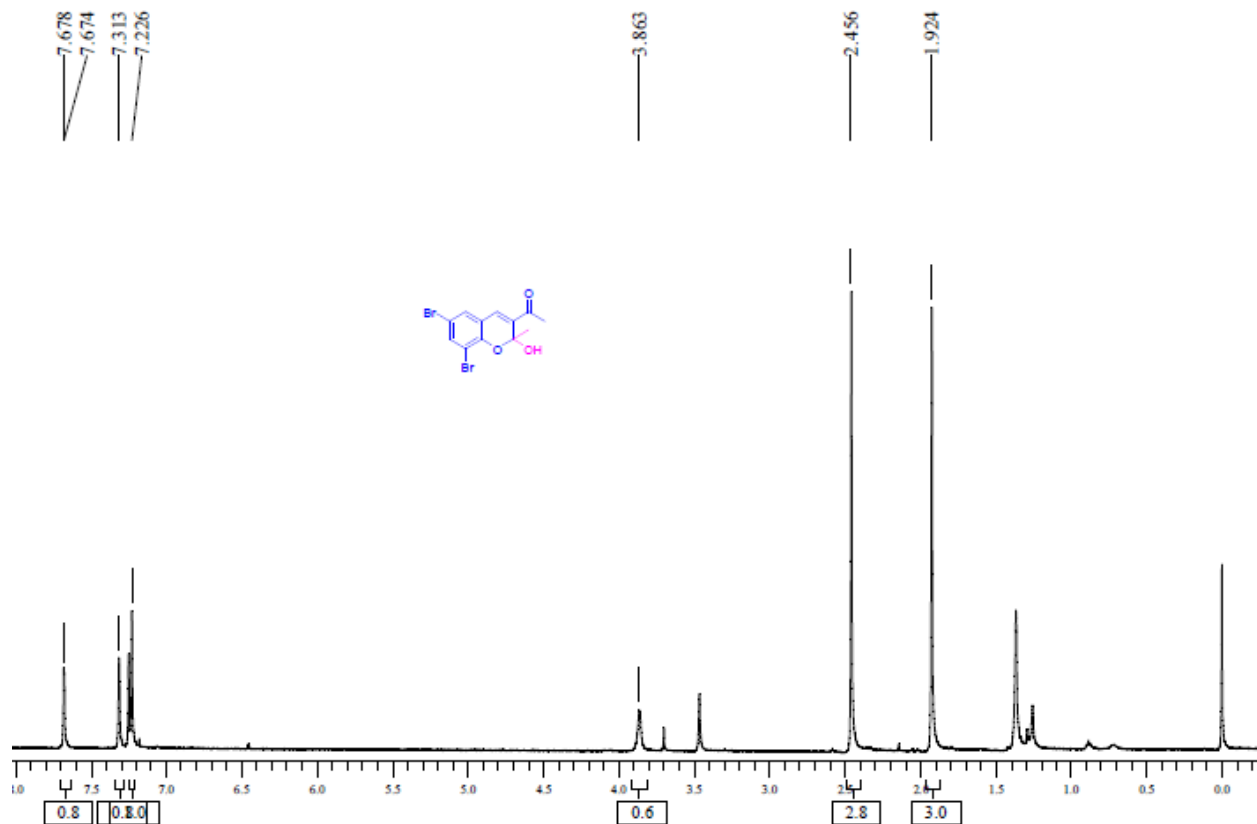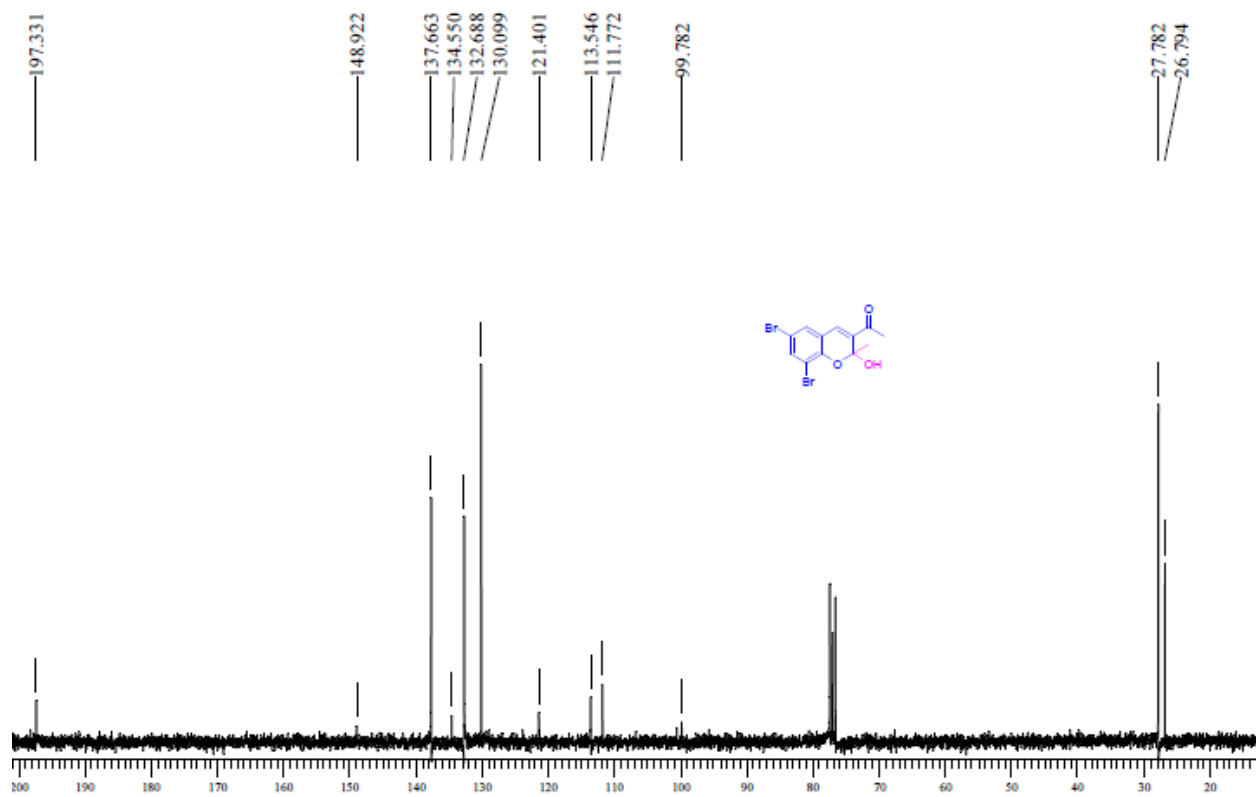



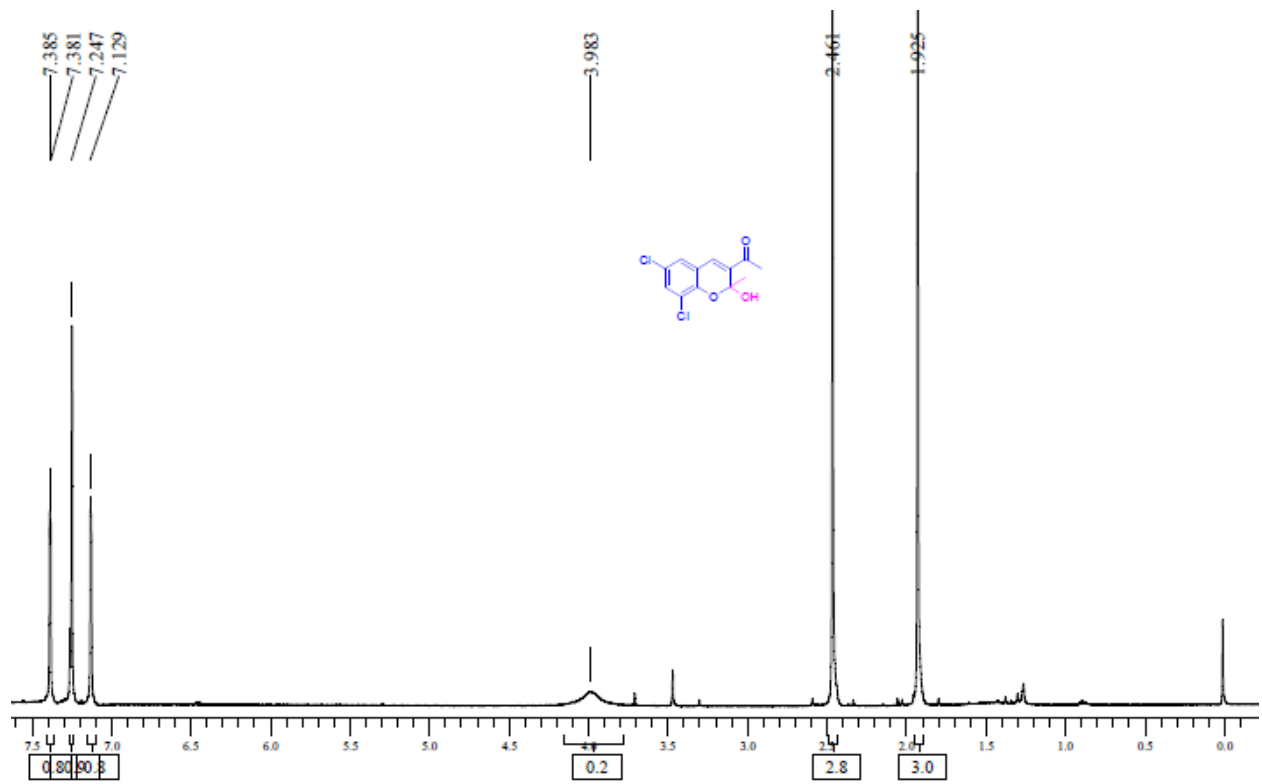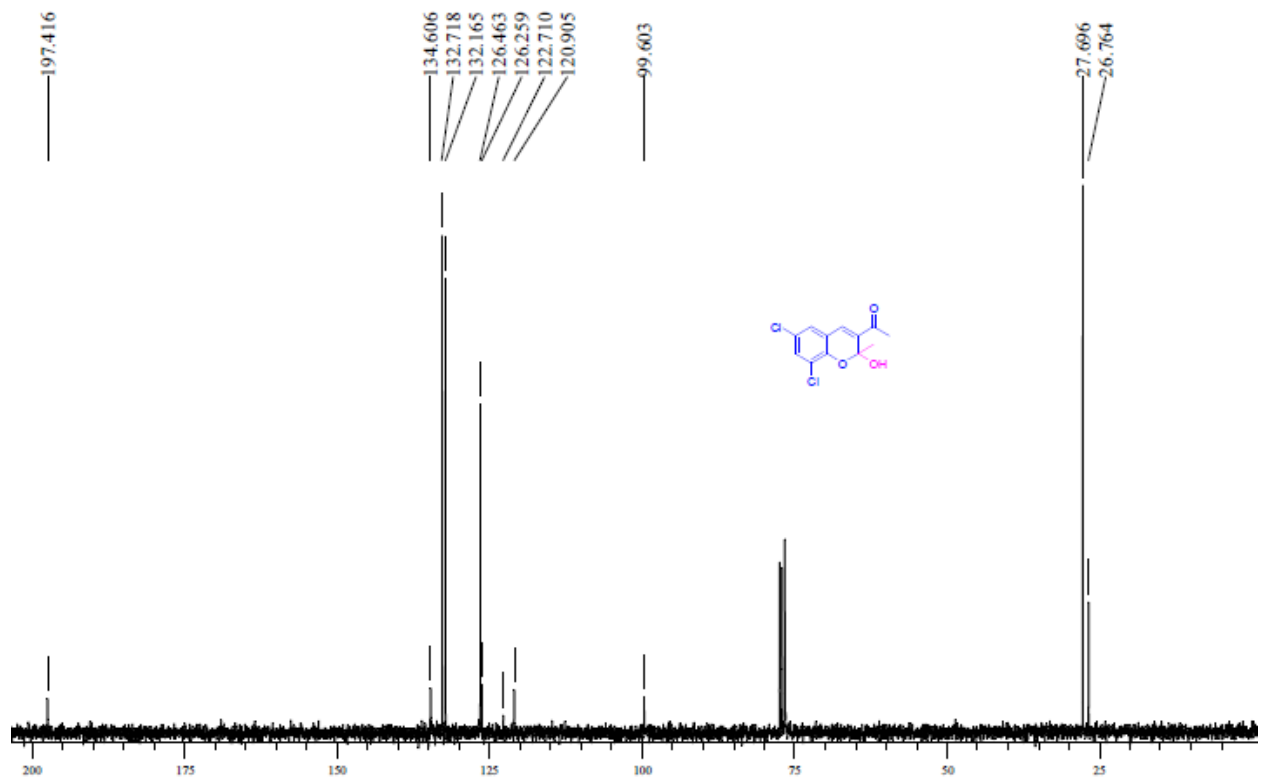

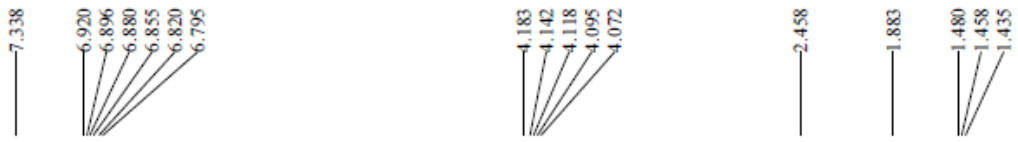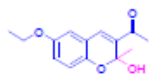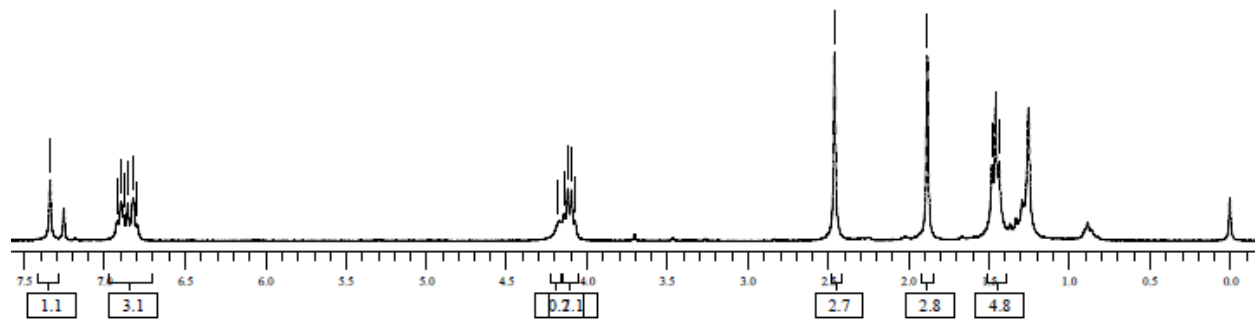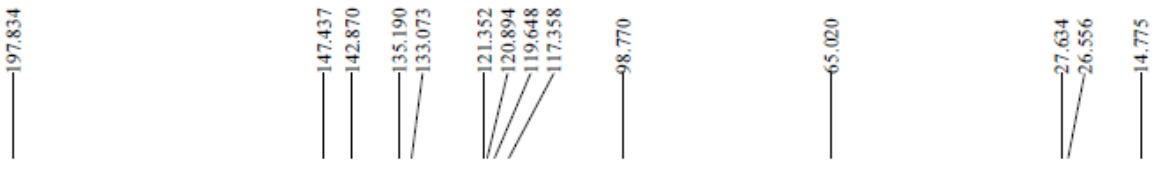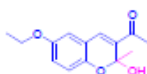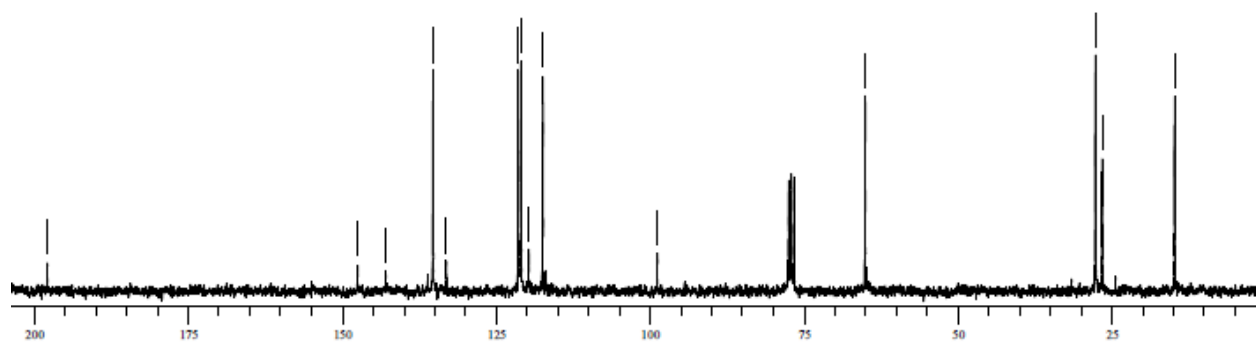

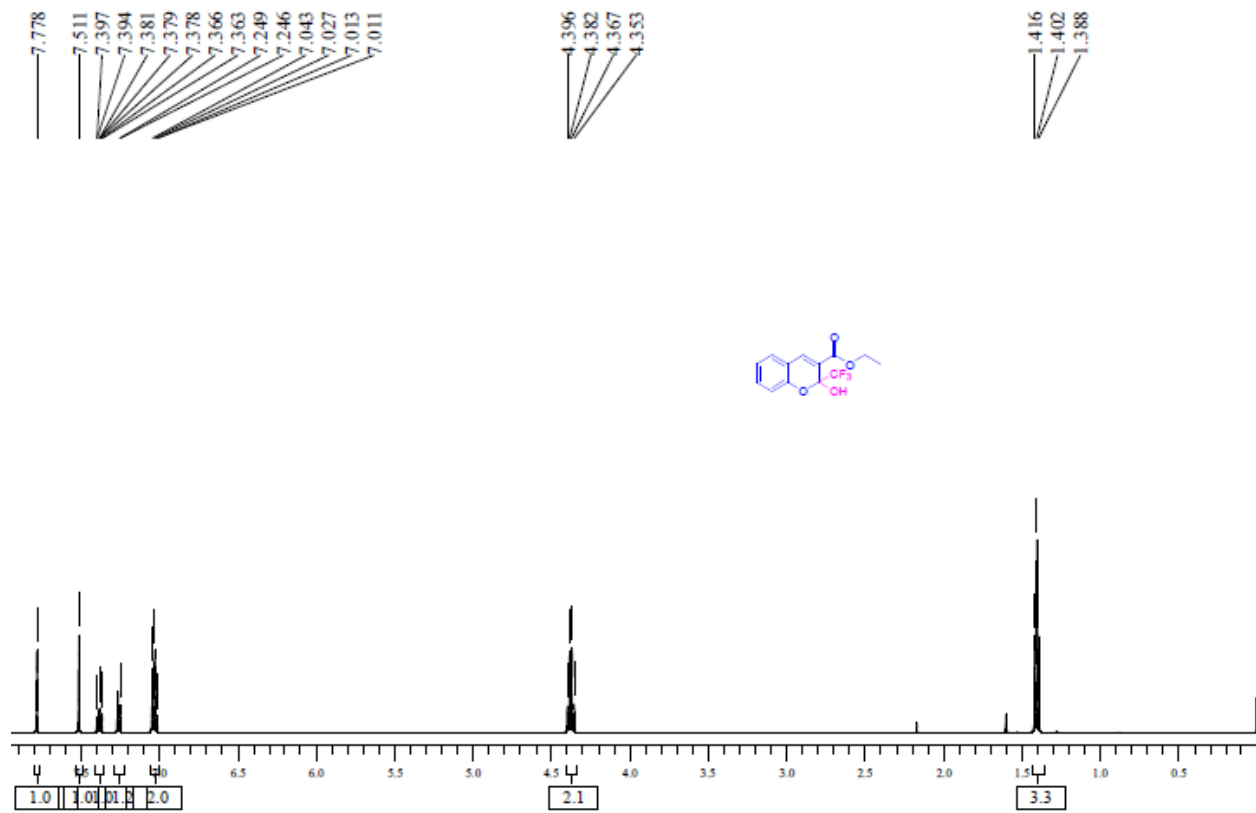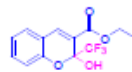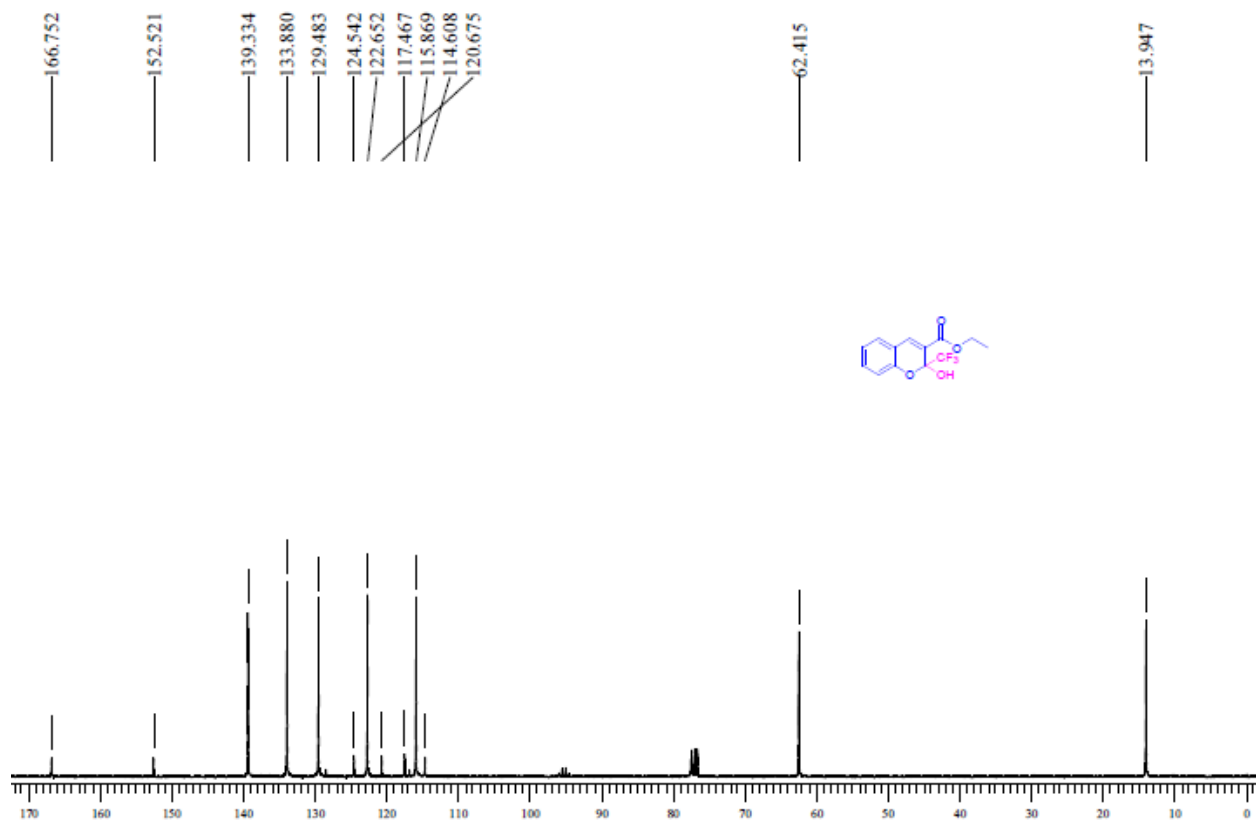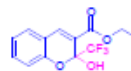

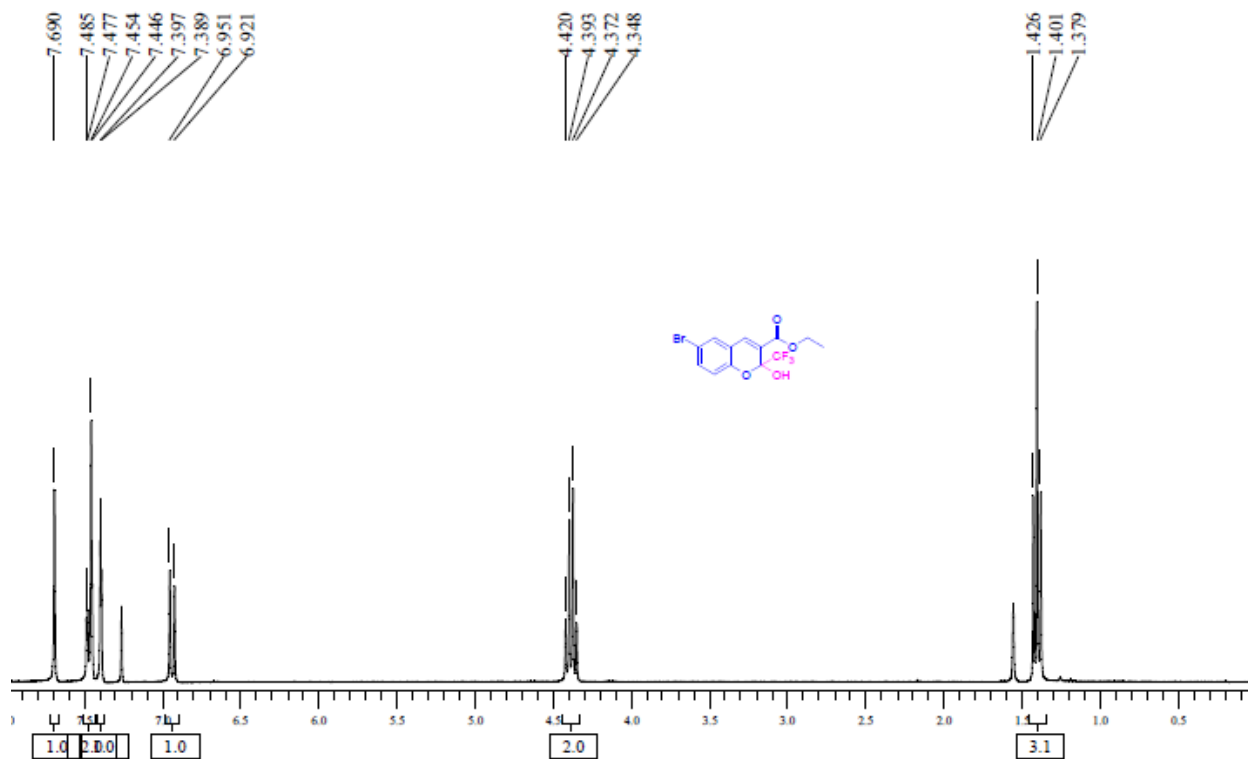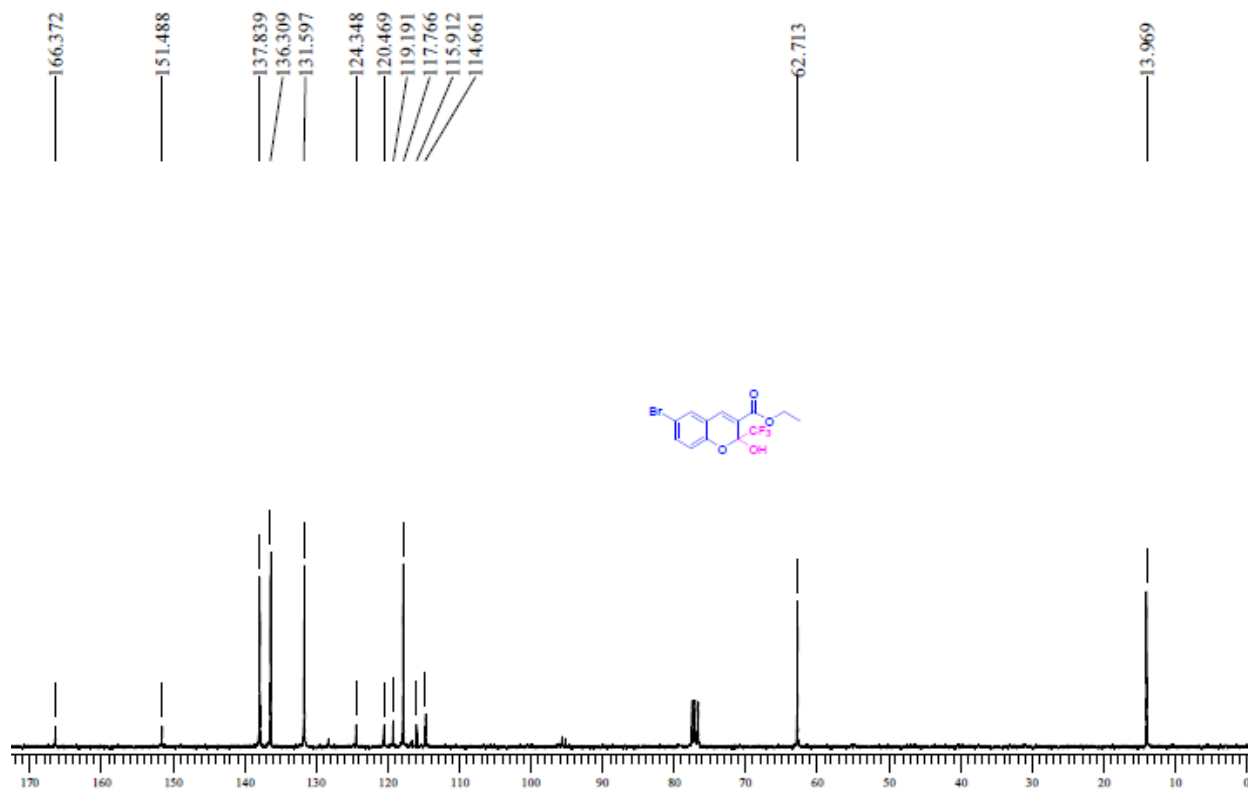

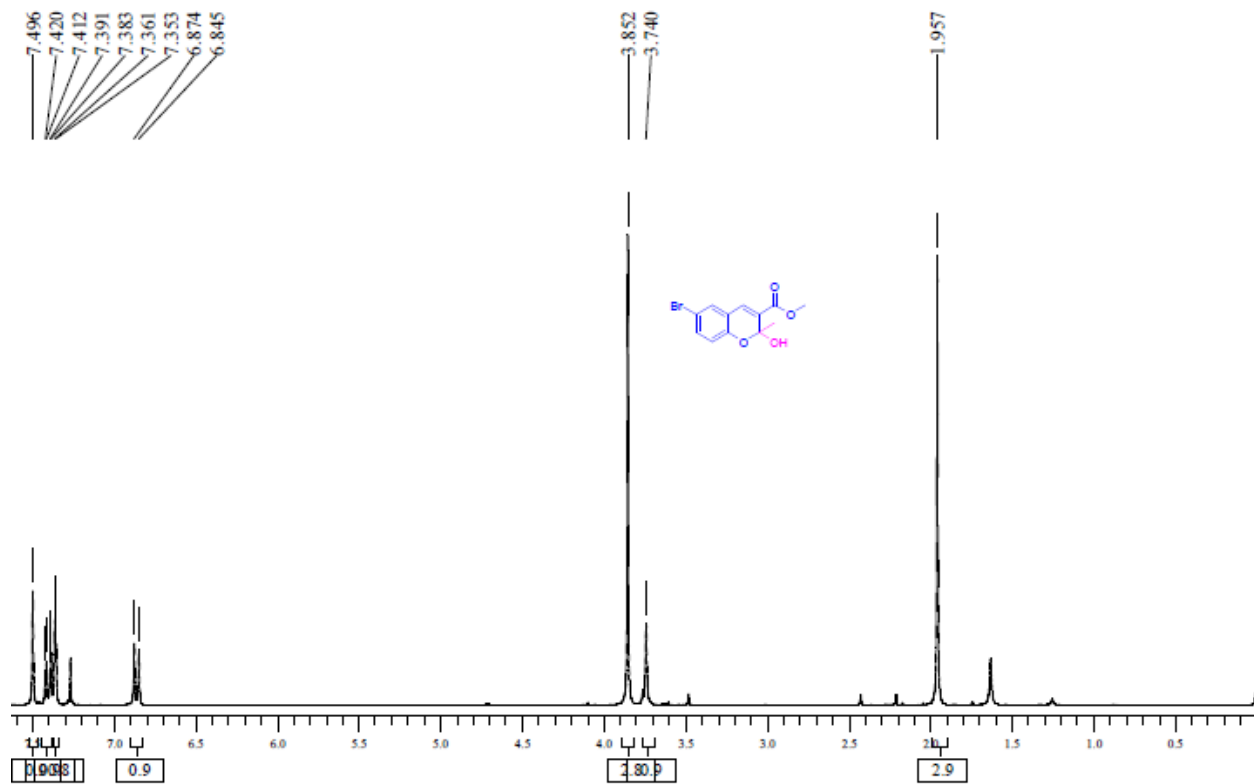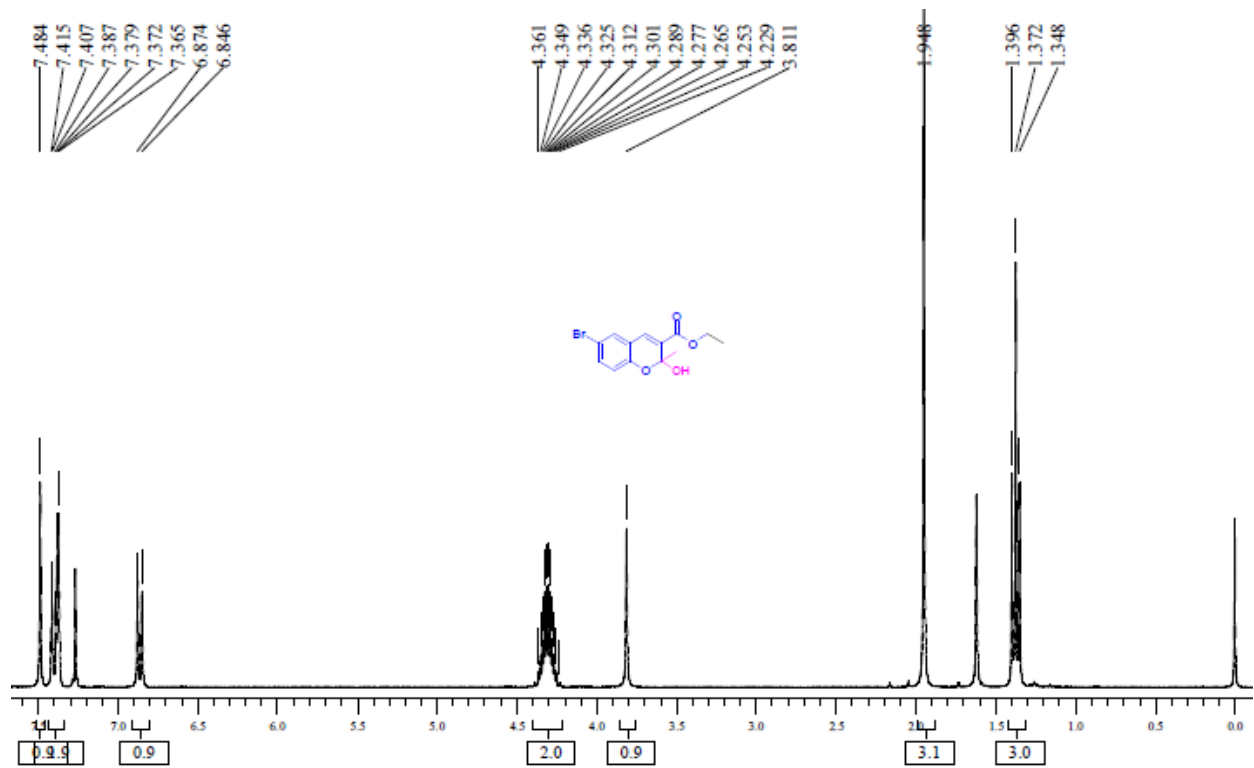

164.805  
151.515  
134.714  
132.719  
130.743  
126.677  
120.510  
118.566  
113.583  
98.036  
61.280  
27.649  
14.153

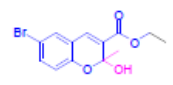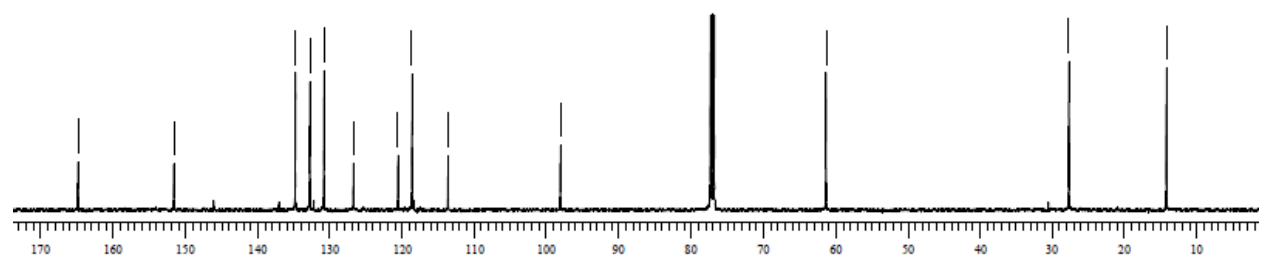

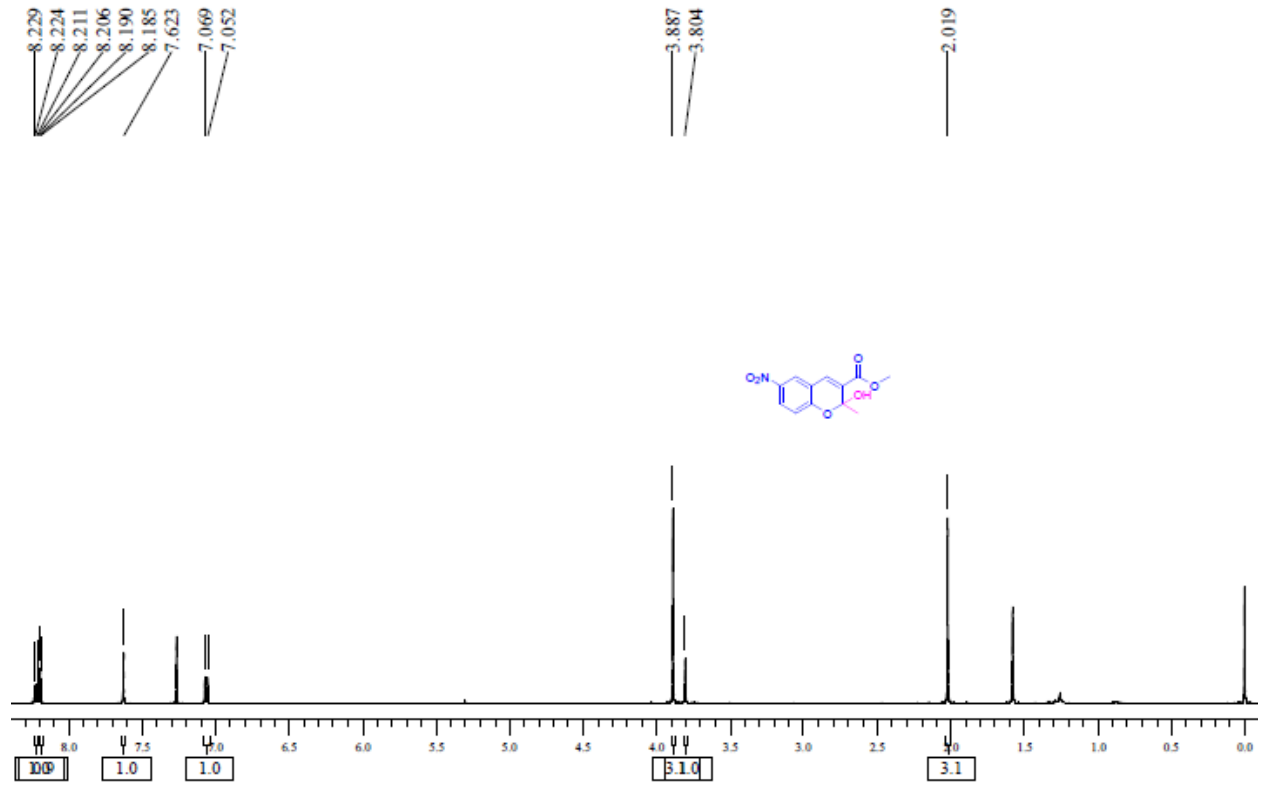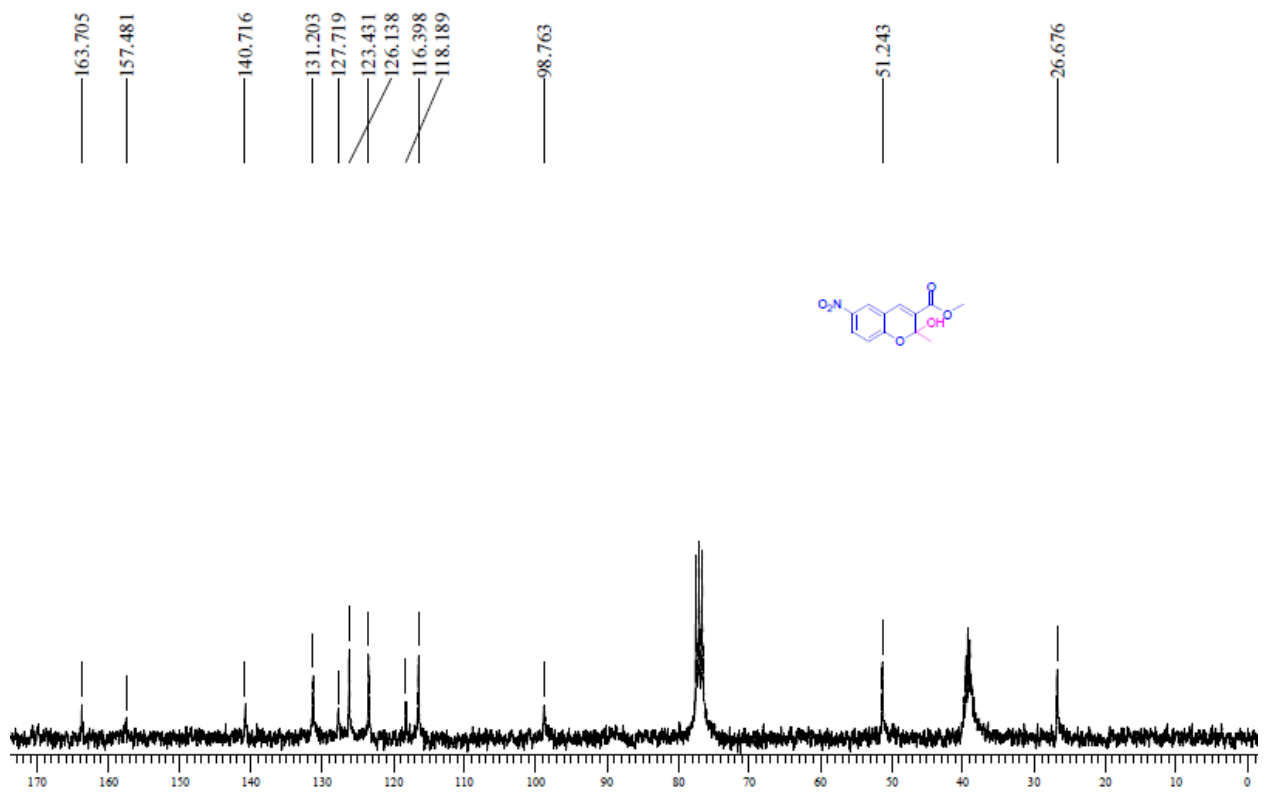

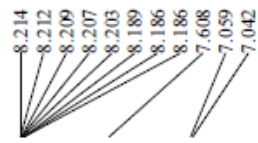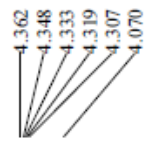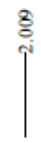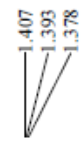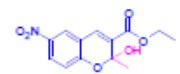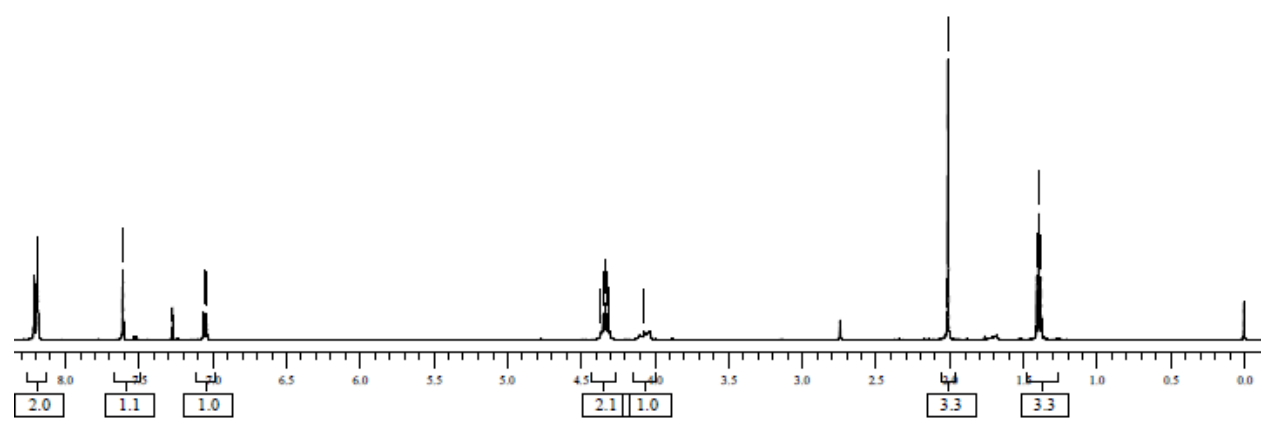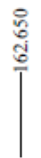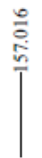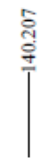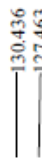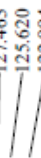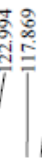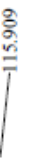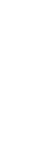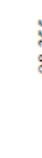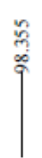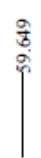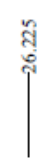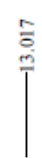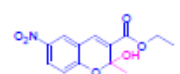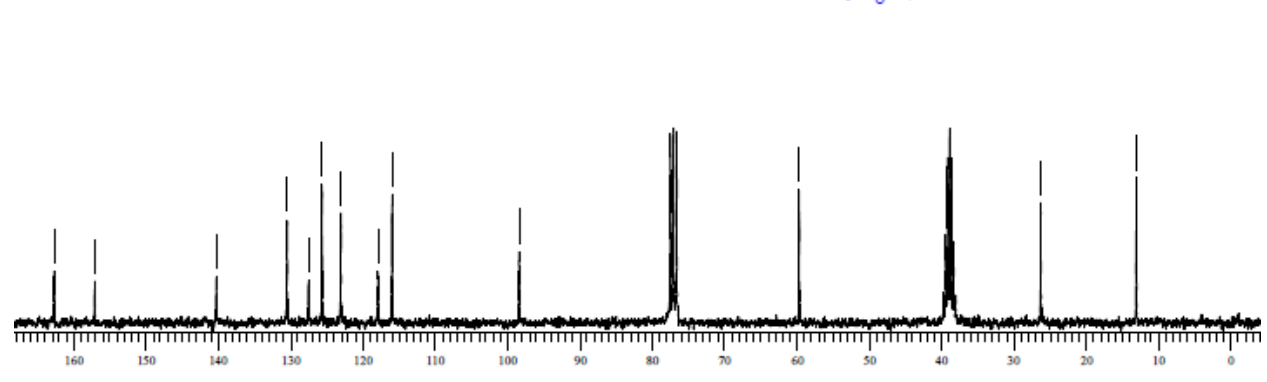



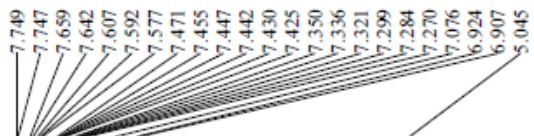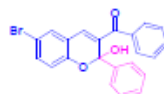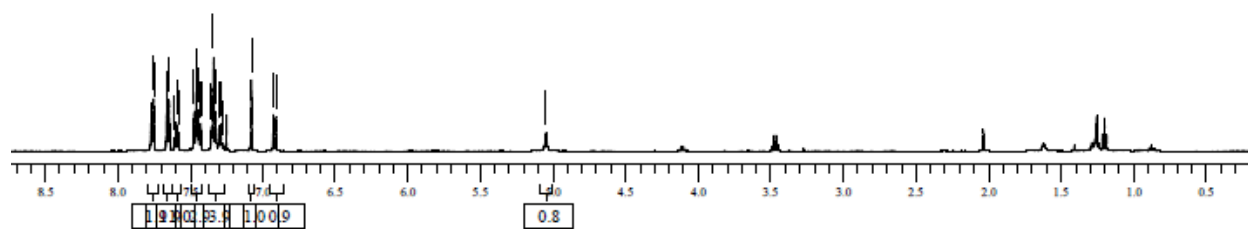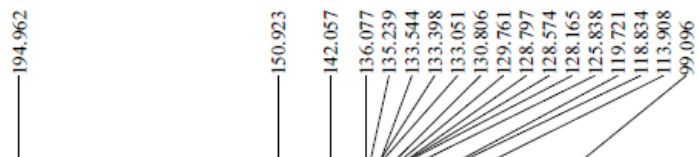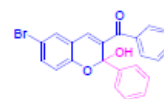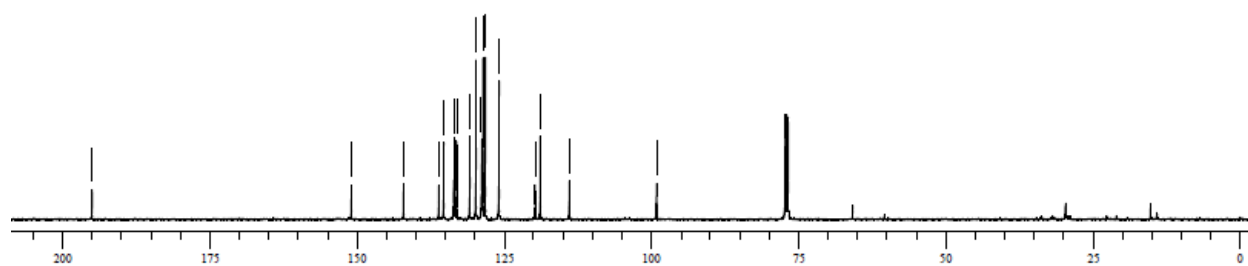

Supplement: c5nj01377a1.pdf [file c5nj01377a1.pdf]
